# Supplementary material for: Genome-wide association screens for Achilles tendon and ACL tears and tendinopathy
Source: PLoS One. 2017 Mar 30;12(3):e0170422. doi: 10.1371/journal.pone.0170422 (PMC5373512; doi:10.1371/journal.pone.0170422)
Supplement: S2 Table — A. Achilles tendon injury. B. ACL rupture. (XLS) [file pone.0170422.s003.xls]

## Sheet: Achilles_ldsc3.txt.6134eeb1-ebe
rg = genetic correlation
se = standard error of rg
p = p-value for rg
h2_obs, h2_obs_se = observed scale h2 for trait 2 and standard error
h2_int, h2_int_se = single-trait LD Score regression intercept for trait 2 and standard error
gcov_int, gcov_int_se = cross-trait LD Score regression intercept and standard error.
Genetic correlation results for Achilles tendon injury
trait1	trait2	PMID	Category	ethnicity	note	rg	se	z	p	h2_obs	h2_obs_se	h2_int	h2_int_se	gcov_int	gcov_int_se
Achilles_ldsc3.txt	Inflammatory Bowel Disease (Euro)	26192919	autoimmune	Caucasian	SNPs from the MHC (chr6 26M~34M) region was removed for this traits	0.6899	1.0456	0.6599	0.5093	0.3802	0.0973	1.1051	0.0383	-0.0014	0.0151
Achilles_ldsc3.txt	Ulcerative colitis	26192919	autoimmune	Caucasian	SNPs from the MHC (chr6 26M~34M) region was removed for this traits	0.4218	0.715	0.59	0.5552	0.3174	0.0948	1.0886	0.0424	-0.0007	0.0138
Achilles_ldsc3.txt	Years of schooling	27225129	eduction	Caucasian	SNPs from the MHC (chr6 26M~34M) region was removed for this traits	-0.7571	1.2975	-0.5835	0.5595	0.1253	0.0123	0.953	0.0286	0.0189	0.0148
Achilles_ldsc3.txt	Crohns disease	26192919	autoimmune	Caucasian	SNPs from the MHC (chr6 26M~34M) region was removed for this traits	0.3803	0.6718	0.5661	0.5714	0.5519	0.1364	1.052	0.0302	0.0073	0.0146
Achilles_ldsc3.txt	extreme bmi	23563607	anthropometric	Caucasian	SNPs from the MHC (chr6 26M~34M) region was removed for this traits	0.3388	0.6035	0.5614	0.5745	1.3026	0.2061	0.9279	0.0344	-0.0078	0.022
Achilles_ldsc3.txt	Attention deficit hyperactivity disorder	20732625	psychiatric	Caucasian	Caution: using this data may yield results outside bounds due to relative low Z score of the SNP heritability of the trait; SNPs from the MHC (chr6 26M~34M) region was removed for this traits	1.7677	3.1808	0.5557	0.5784	0.4185	0.248	1.0026	0.0187	-0.0262	0.0132
Achilles_ldsc3.txt	extreme waist-to-hip ratio	23563607	anthropometric	Caucasian	SNPs from the MHC (chr6 26M~34M) region was removed for this traits	0.5731	1.0323	0.5552	0.5788	0.886	0.2093	0.9268	0.0273	-0.0035	0.0161
Achilles_ldsc3.txt	Eczema	26482879	autoimmune	mixed	Caution: using this data may yield less robust results due to minor departure of the LD structure; SNPs from the MHC (chr6 26M~34M) region was removed for this traits	-0.9023	1.8033	-0.5004	0.6168	0.0333	0.0385	1.0507	0.0206	0.0236	0.0127
Achilles_ldsc3.txt	Coronary artery disease	26343387	cardiometabolic	mixed	Caution: using this data may yield less robust results due to minor departure of the LD structure; SNPs from the MHC (chr6 26M~34M) region was removed for this traits	0.5346	1.1056	0.4836	0.6287	0.0865	0.0125	1.0456	0.025	-0.0099	0.012
Achilles_ldsc3.txt	Autism spectrum disorder	0	psychiatric	Caucasian	SNPs from the MHC (chr6 26M~34M) region was removed for this traits	0.9777	2.1441	0.456	0.6484	0.4043	0.1428	0.9749	0.0205	-0.0076	0.0133
Achilles_ldsc3.txt	Anorexia Nervosa	24514567	psychiatric	Caucasian	SNPs from the MHC (chr6 26M~34M) region was removed for this traits	-0.2385	0.5671	-0.4206	0.674	0.5663	0.0765	0.8814	0.0185	0.0077	0.0139
Achilles_ldsc3.txt	Mean Caudate	25607358	brain_volumn	Caucasian	SNPs from the MHC (chr6 26M~34M) region was removed for this traits	0.8212	2.6146	0.3141	0.7535	0.3533	0.1101	0.9589	0.0199	-0.0065	0.0134
Achilles_ldsc3.txt	Cigarettes smoked per day	20418890	smoking_behaviour	Caucasian	SNPs from the MHC (chr6 26M~34M) region was removed for this traits	-1.4442	4.6433	-0.311	0.7558	0.0193	0.0283	1.0259	0.0167	0.0143	0.0123
Achilles_ldsc3.txt	Mean Thalamus	25607358	brain_volumn	Caucasian	SNPs from the MHC (chr6 26M~34M) region was removed for this traits	-1.3895	4.6028	-0.3019	0.7627	0.1379	0.0984	0.9743	0.0194	0.0081	0.0135
Achilles_ldsc3.txt	Mean Hippocampus	25607358	brain_volumn	Caucasian	SNPs from the MHC (chr6 26M~34M) region was removed for this traits	-1.4477	5.0625	-0.286	0.7749	0.07	0.1203	0.9792	0.0224	0.014	0.0129
Achilles_ldsc3.txt	Femoral Neck bone mineral density	26367794	bone	mixed	Caution: using this data may yield less robust results due to minor departure of the LD structure; SNPs from the MHC (chr6 26M~34M) region was removed for this traits	-0.3648	1.3804	-0.2642	0.7916	0.132	0.0321	0.994	0.0247	0.0136	0.0146
Achilles_ldsc3.txt	Mean Pallidum	25607358	brain_volumn	Caucasian	SNPs from the MHC (chr6 26M~34M) region was removed for this traits	-0.2238	1.201	-0.1864	0.8521	0.2658	0.1142	0.9689	0.0215	0.0031	0.014
Achilles_ldsc3.txt	Ever vs never smoked	20418890	smoking_behaviour	Caucasian	SNPs from the MHC (chr6 26M~34M) region was removed for this traits	0.3716	2.0468	0.1816	0.8559	0.0802	0.0192	1.0155	0.0178	-0.006	0.0135
Achilles_ldsc3.txt	Mean Putamen	25607358	brain_volumn	Caucasian	SNPs from the MHC (chr6 26M~34M) region was removed for this traits	-0.1941	1.1282	-0.172	0.8634	0.2918	0.1087	0.9525	0.0211	0.0125	0.0119
Achilles_ldsc3.txt	age of smoking initiation	20418890	smoking_behaviour	Caucasian	SNPs from the MHC (chr6 26M~34M) region was removed for this traits	-0.1942	1.2456	-0.1559	0.8761	0.1355	0.0498	0.9968	0.0166	0.0041	0.0131
Achilles_ldsc3.txt	lumbar spine bone mineral density	22504420	bone	Caucasian	SNPs from the MHC (chr6 26M~34M) region was removed for this traits	-0.2892	1.9543	-0.148	0.8824	0.2112	0.0627	1.046	0.0362	0.0053	0.014
Achilles_ldsc3.txt	Rheumatoid Arthritis	24390342	autoimmune	Caucasian	SNPs from the MHC (chr6 26M~34M) region was removed for this traits	-0.0763	0.5721	-0.1334	0.8938	0.3373	0.1678	0.9774	0.0696	-0.0053	0.0155
Achilles_ldsc3.txt	Lumbar Spine bone mineral density	26367794	bone	mixed	Caution: using this data may yield less robust results due to minor departure of the LD structure; SNPs from the MHC (chr6 26M~34M) region was removed for this traits	-0.125	0.9496	-0.1316	0.8953	0.0928	0.0317	0.9932	0.0241	-0.0013	0.0141
Achilles_ldsc3.txt	Former vs Current smoker	20418890	smoking_behaviour	Caucasian	SNPs from the MHC (chr6 26M~34M) region was removed for this traits	0.1146	1.1216	0.1022	0.9186	0.0486	0.034	1.0213	0.02	-0.0119	0.012
Achilles_ldsc3.txt	ICV	25607358	brain_volumn	Caucasian	SNPs from the MHC (chr6 26M~34M) region was removed for this traits	0.064	0.632	0.1013	0.9193	0.2364	0.1154	0.9758	0.0186	-0.0036	0.0108
Achilles_ldsc3.txt	Major depressive disorder	22472876	psychiatric	Caucasian	SNPs from the MHC (chr6 26M~34M) region was removed for this traits	-0.0582	0.6526	-0.0892	0.9289	0.2355	0.08	0.9979	0.0199	-0.0059	0.0137
Achilles_ldsc3.txt	Neuroticism	24828478	personality	Caucasian	SNPs from the MHC (chr6 26M~34M) region was removed for this traits	0.1163	1.3047	0.0891	0.929	0.0128	0.0077	1.0193	0.0174	0.0127	0.0141
Achilles_ldsc3.txt	PGC cross-disorder analysis	23453885	psychiatric	Caucasian	SNPs from the MHC (chr6 26M~34M) region was removed for this traits	0.0326	0.5786	0.0563	0.9551	0.1853	0.0351	1.0184	0.0322	-0.0051	0.0198
Achilles_ldsc3.txt	Alzheimers disease	24162737	psychiatric	Caucasian	SNPs from the MHC (chr6 26M~34M) region was removed for this traits	0.0041	0.7586	0.0054	0.9957	0.0767	0.0302	1.0294	0.0216	0.0005	0.0148
Achilles_ldsc3.txt	adiponectin	22479202	cardiometabolic	mixed	Caution: using this data may yield less robust results due to minor departure of the LD structure; SNPs from the MHC (chr6 26M~34M) region was removed for this traits	NA	NA	NA	NA	NA	NA	NA	NA	NA	NA
Achilles_ldsc3.txt	child birth length	25281659	anthropometric	Caucasian	SNPs from the MHC (chr6 26M~34M) region was removed for this traits	NA	NA	NA	NA	NA	NA	NA	NA	NA	NA
Achilles_ldsc3.txt	child birth weight	23202124	anthropometric	Caucasian	SNPs from the MHC (chr6 26M~34M) region was removed for this traits	NA	NA	NA	NA	NA	NA	NA	NA	NA	NA
Achilles_ldsc3.txt	body mass index	20935630	anthropometric	Caucasian	SNPs from the MHC (chr6 26M~34M) region was removed for this traits	NA	NA	NA	NA	NA	NA	NA	NA	NA	NA
Achilles_ldsc3.txt	Childhood_IQ	23358156	education	Caucasian	SNPs from the MHC (chr6 26M~34M) region was removed for this traits	NA	NA	NA	NA	NA	NA	NA	NA	NA	NA
Achilles_ldsc3.txt	Childhood obesity	22484627	anthropometric	Caucasian	SNPs from the MHC (chr6 26M~34M) region was removed for this traits	NA	NA	NA	NA	NA	NA	NA	NA	NA	NA
Achilles_ldsc3.txt	Type 2 Diabetes	22885922	glycemic	Caucasian	SNPs from the MHC (chr6 26M~34M) region was removed for this traits	NA	NA	NA	NA	NA	NA	NA	NA	NA	NA
Achilles_ldsc3.txt	fasting glucose main effect	22581228	glycemic	Caucasian	SNPs from the MHC (chr6 26M~34M) region was removed for this traits	NA	NA	NA	NA	NA	NA	NA	NA	NA	NA
Achilles_ldsc3.txt	fasting insulin main effect	22581228	glycemic	Caucasian	SNPs from the MHC (chr6 26M~34M) region was removed for this traits	NA	NA	NA	NA	NA	NA	NA	NA	NA	NA
Achilles_ldsc3.txt	fasting proinsulin	20081858	glycemic	Caucasian	Caution: using this data may yield results outside bounds due to relative low Z score of the SNP heritability of the trait; SNPs from the MHC (chr6 26M~34M) region was removed for this traits	NA	NA	NA	NA	-0.0182	0.1171	1.0029	0.0197	-0.0075	0.0154
Achilles_ldsc3.txt	urinary albumin-to-creatinine ratio (non-diabetes)	26631737	kidney	Caucasian	SNPs from the MHC (chr6 26M~34M) region was removed for this traits	NA	NA	NA	NA	NA	NA	NA	NA	NA	NA
Achilles_ldsc3.txt	Chronic Kidney Disease	26831199	kidney	mixed	Caution: using this data may yield less robust results due to minor departure of the LD structure; SNPs from the MHC (chr6 26M~34M) region was removed for this traits	NA	NA	NA	NA	NA	NA	NA	NA	NA	NA
Achilles_ldsc3.txt	serum creatinine (non-diabetes)	26831199	kidney	mixed	Caution: using this data may yield less robust results due to minor departure of the LD structure; SNPs from the MHC (chr6 26M~34M) region was removed for this traits	NA	NA	NA	NA	NA	NA	NA	NA	NA	NA
Achilles_ldsc3.txt	serum creatinine	26831199	kidney	mixed	Caution: using this data may yield less robust results due to minor departure of the LD structure; SNPs from the MHC (chr6 26M~34M) region was removed for this traits	NA	NA	NA	NA	NA	NA	NA	NA	NA	NA
Achilles_ldsc3.txt	serum cystatin c	26831199	kidney	mixed	Caution: using this data may yield less robust results due to minor departure of the LD structure; SNPs from the MHC (chr6 26M~34M) region was removed for this traits	NA	NA	NA	NA	NA	NA	NA	NA	NA	NA
Achilles_ldsc3.txt	urinary albumin-to-creatinine ratio	26631737	kidney	Caucasian	SNPs from the MHC (chr6 26M~34M) region was removed for this traits	NA	NA	NA	NA	NA	NA	NA	NA	NA	NA
Achilles_ldsc3.txt	Asthma	17611496	autoimmune	Caucasian	SNPs from the MHC (chr6 26M~34M) region was removed for this traits	NA	NA	NA	NA	0.0629	0.0522	1.027	0.0207	0.0094	0.0154
Achilles_ldsc3.txt	femoral neck bone mineral density	22504420	bone	Caucasian	SNPs from the MHC (chr6 26M~34M) region was removed for this traits	NA	NA	NA	NA	NA	NA	NA	NA	NA	NA
Achilles_ldsc3.txt	extreme height	23563607	anthropometric	Caucasian	SNPs from the MHC (chr6 26M~34M) region was removed for this traits	NA	NA	NA	NA	NA	NA	NA	NA	NA	NA
Achilles_ldsc3.txt	height_2010	20881960	anthropometric	Caucasian	SNPs from the MHC (chr6 26M~34M) region was removed for this traits	NA	NA	NA	NA	NA	NA	NA	NA	NA	NA
Achilles_ldsc3.txt	obesity class 1	23563607	anthropometric	Caucasian	SNPs from the MHC (chr6 26M~34M) region was removed for this traits	NA	NA	NA	NA	NA	NA	NA	NA	NA	NA
Achilles_ldsc3.txt	obesity class 2	23563607	anthropometric	Caucasian	SNPs from the MHC (chr6 26M~34M) region was removed for this traits	NA	NA	NA	NA	NA	NA	NA	NA	NA	NA
Achilles_ldsc3.txt	obesity class 3	23563607	anthropometric	Caucasian	SNPs from the MHC (chr6 26M~34M) region was removed for this traits	NA	NA	NA	NA	NA	NA	NA	NA	NA	NA
Achilles_ldsc3.txt	overweight	23563607	anthropometric	Caucasian	SNPs from the MHC (chr6 26M~34M) region was removed for this traits	NA	NA	NA	NA	NA	NA	NA	NA	NA	NA
Achilles_ldsc3.txt	Neo-conscientiousness	21173776	personality	Caucasian	Caution: using this data may yield results outside bounds due to relative low Z score of the SNP heritability of the trait; SNPs from the MHC (chr6 26M~34M) region was removed for this traits	NA	NA	NA	NA	NA	NA	NA	NA	NA	NA
Achilles_ldsc3.txt	Neo-openness to experience	21173776	personality	Caucasian	SNPs from the MHC (chr6 26M~34M) region was removed for this traits	NA	NA	NA	NA	NA	NA	NA	NA	NA	NA
Achilles_ldsc3.txt	HDL cholesterol	20686565	lipids	Caucasian	SNPs from the MHC (chr6 26M~34M) region was removed for this traits	NA	NA	NA	NA	0.1251	0.0256	1.007	0.0283	0.0107	0.0146
Achilles_ldsc3.txt	hip circumference	25673412	anthropometric	Caucasian	SNPs from the MHC (chr6 26M~34M) region was removed for this traits	NA	NA	NA	NA	NA	NA	NA	NA	NA	NA
Achilles_ldsc3.txt	infant head circumference	22504419	anthropometric	Caucasian	SNPs from the MHC (chr6 26M~34M) region was removed for this traits	NA	NA	NA	NA	NA	NA	NA	NA	NA	NA
Achilles_ldsc3.txt	LDL cholesterol	20686565	lipids	Caucasian	SNPs from the MHC (chr6 26M~34M) region was removed for this traits	NA	NA	NA	NA	NA	NA	NA	NA	NA	NA
Achilles_ldsc3.txt	cognitive performance	25201988	education	Caucasian	SNPs from the MHC (chr6 26M~34M) region was removed for this traits	NA	NA	NA	NA	NA	NA	NA	NA	NA	NA
Achilles_ldsc3.txt	2hr glucose adjusted for BMI	20081857	glycemic	Caucasian	Caution: using this data may yield results outside bounds due to relative low Z score of the SNP heritability of the trait; SNPs from the MHC (chr6 26M~34M) region was removed for this traits	NA	NA	NA	NA	NA	NA	NA	NA	NA	NA
Achilles_ldsc3.txt	HbA1C	20858683	glycemic	Caucasian	SNPs from the MHC (chr6 26M~34M) region was removed for this traits	NA	NA	NA	NA	NA	NA	NA	NA	NA	NA
Achilles_ldsc3.txt	HOMA-B	20081858	glycemic	Caucasian	SNPs from the MHC (chr6 26M~34M) region was removed for this traits	NA	NA	NA	NA	NA	NA	NA	NA	NA	NA
Achilles_ldsc3.txt	HOMA-IR	20081858	glycemic	Caucasian	SNPs from the MHC (chr6 26M~34M) region was removed for this traits	NA	NA	NA	NA	NA	NA	NA	NA	NA	NA
Achilles_ldsc3.txt	Age at Menarche	25231870	reproductive	Caucasian	SNPs from the MHC (chr6 26M~34M) region was removed for this traits	NA	NA	NA	NA	NA	NA	NA	NA	NA	NA
Achilles_ldsc3.txt	serumurate_overweight_all	25811787	uric_acid	Caucasian	Caution: using this data may yield results outside bounds due to relative low Z score of the SNP heritability of the trait; SNPs from the MHC (chr6 26M~34M) region was removed for this traits	NA	NA	NA	NA	NA	NA	NA	NA	NA	NA
Achilles_ldsc3.txt	Bipolar disorder	21926972	psychiatric	Caucasian	SNPs from the MHC (chr6 26M~34M) region was removed for this traits	NA	NA	NA	NA	NA	NA	NA	NA	NA	NA
Achilles_ldsc3.txt	Parkinsons disease	19915575	psychiatric	Caucasian	SNPs from the MHC (chr6 26M~34M) region was removed for this traits	NA	NA	NA	NA	0.1875	0.293	1.1115	0.0281	-0.0005	0.0127
Achilles_ldsc3.txt	Schizophrenia	25056061	psychiatric	mixed	Caution: using this data may yield less robust results due to minor departure of the LD structure; SNPs from the MHC (chr6 26M~34M) region was removed for this traits	NA	NA	NA	NA	NA	NA	NA	NA	NA	NA
Achilles_ldsc3.txt	College completion	23722424	education	Caucasian	SNPs from the MHC (chr6 26M~34M) region was removed for this traits	NA	NA	NA	NA	NA	NA	NA	NA	NA	NA
Achilles_ldsc3.txt	years of schooling	23722424	education	Caucasian	SNPs from the MHC (chr6 26M~34M) region was removed for this traits	NA	NA	NA	NA	NA	NA	NA	NA	NA	NA
Achilles_ldsc3.txt	Acetoacetate	27005778	metabolites	Caucasian	Caution: using this data may yield results outside bounds due to relative low Z score of the SNP heritability of the trait; SNPs from the MHC (chr6 26M~34M) region was removed for this traits	NA	NA	NA	NA	NA	NA	NA	NA	NA	NA
Achilles_ldsc3.txt	acetate	27005778	metabolites	Caucasian	Caution: using this data may yield results outside bounds due to relative low Z score of the SNP heritability of the trait; SNPs from the MHC (chr6 26M~34M) region was removed for this traits	NA	NA	NA	NA	NA	NA	NA	NA	NA	NA
Achilles_ldsc3.txt	Alanine	27005778	metabolites	Caucasian	SNPs from the MHC (chr6 26M~34M) region was removed for this traits	NA	NA	NA	NA	NA	NA	NA	NA	NA	NA
Achilles_ldsc3.txt	Albumin	27005778	metabolites	Caucasian	Caution: using this data may yield results outside bounds due to relative low Z score of the SNP heritability of the trait; SNPs from the MHC (chr6 26M~34M) region was removed for this traits	NA	NA	NA	NA	NA	NA	NA	NA	NA	NA
Achilles_ldsc3.txt	Apolipoprotein A-I	27005778	metabolites	Caucasian	SNPs from the MHC (chr6 26M~34M) region was removed for this traits	NA	NA	NA	NA	NA	NA	NA	NA	NA	NA
Achilles_ldsc3.txt	Apolipoprotein B	27005778	metabolites	Caucasian	SNPs from the MHC (chr6 26M~34M) region was removed for this traits	NA	NA	NA	NA	NA	NA	NA	NA	NA	NA
Achilles_ldsc3.txt	Ratio of bisallylic groups to double bonds	27005778	metabolites	Caucasian	Caution: using this data may yield results outside bounds due to relative low Z score of the SNP heritability of the trait; SNPs from the MHC (chr6 26M~34M) region was removed for this traits	NA	NA	NA	NA	NA	NA	NA	NA	NA	NA
Achilles_ldsc3.txt	Ratio of bisallylic groups to total fatty acids	27005778	metabolites	Caucasian	Caution: using this data may yield results outside bounds due to relative low Z score of the SNP heritability of the trait; SNPs from the MHC (chr6 26M~34M) region was removed for this traits	NA	NA	NA	NA	NA	NA	NA	NA	NA	NA
Achilles_ldsc3.txt	Average number of methylene groups per a double bond	27005778	metabolites	Caucasian	Caution: using this data may yield results outside bounds due to relative low Z score of the SNP heritability of the trait; SNPs from the MHC (chr6 26M~34M) region was removed for this traits	NA	NA	NA	NA	NA	NA	NA	NA	NA	NA
Achilles_ldsc3.txt	Citrate	27005778	metabolites	Caucasian	SNPs from the MHC (chr6 26M~34M) region was removed for this traits	NA	NA	NA	NA	NA	NA	NA	NA	NA	NA
Achilles_ldsc3.txt	Creatinine	27005778	metabolites	Caucasian	SNPs from the MHC (chr6 26M~34M) region was removed for this traits	NA	NA	NA	NA	NA	NA	NA	NA	NA	NA
Achilles_ldsc3.txt	Average number of double bonds in a fatty acid chain	27005778	metabolites	Caucasian	SNPs from the MHC (chr6 26M~34M) region was removed for this traits	NA	NA	NA	NA	NA	NA	NA	NA	NA	NA
Achilles_ldsc3.txt	22:6; docosahexaenoic acid	27005778	metabolites	Caucasian	SNPs from the MHC (chr6 26M~34M) region was removed for this traits	NA	NA	NA	NA	NA	NA	NA	NA	NA	NA
Achilles_ldsc3.txt	Free cholesterol to esterified cholesterol ratio	27005778	metabolites	Caucasian	Caution: using this data may yield results outside bounds due to relative low Z score of the SNP heritability of the trait; SNPs from the MHC (chr6 26M~34M) region was removed for this traits	NA	NA	NA	NA	NA	NA	NA	NA	NA	NA
Achilles_ldsc3.txt	Description of average fatty acid chain length; not actual carbon number	27005778	metabolites	Caucasian	SNPs from the MHC (chr6 26M~34M) region was removed for this traits	NA	NA	NA	NA	NA	NA	NA	NA	NA	NA
Achilles_ldsc3.txt	Omega-3 fatty acids	27005778	metabolites	Caucasian	SNPs from the MHC (chr6 26M~34M) region was removed for this traits	NA	NA	NA	NA	NA	NA	NA	NA	NA	NA
Achilles_ldsc3.txt	Omega-9 and saturated fatty acids	27005778	metabolites	Caucasian	Caution: using this data may yield results outside bounds due to relative low Z score of the SNP heritability of the trait; SNPs from the MHC (chr6 26M~34M) region was removed for this traits	NA	NA	NA	NA	NA	NA	NA	NA	NA	NA
Achilles_ldsc3.txt	Free cholesterol	27005778	metabolites	Caucasian	Caution: using this data may yield results outside bounds due to relative low Z score of the SNP heritability of the trait; SNPs from the MHC (chr6 26M~34M) region was removed for this traits	NA	NA	NA	NA	NA	NA	NA	NA	NA	NA
Achilles_ldsc3.txt	Glucose	27005778	metabolites	Caucasian	SNPs from the MHC (chr6 26M~34M) region was removed for this traits	NA	NA	NA	NA	NA	NA	NA	NA	NA	NA
Achilles_ldsc3.txt	Glutamine	27005778	metabolites	Caucasian	SNPs from the MHC (chr6 26M~34M) region was removed for this traits	NA	NA	NA	NA	NA	NA	NA	NA	NA	NA
Achilles_ldsc3.txt	Glycoprotein acetyls; mainly a1-acid glycoprotein	27005778	metabolites	Caucasian	SNPs from the MHC (chr6 26M~34M) region was removed for this traits	NA	NA	NA	NA	NA	NA	NA	NA	NA	NA
Achilles_ldsc3.txt	Total cholesterol in HDL	27005778	metabolites	Caucasian	SNPs from the MHC (chr6 26M~34M) region was removed for this traits	NA	NA	NA	NA	NA	NA	NA	NA	NA	NA
Achilles_ldsc3.txt	Mean diameter for HDL particles	27005778	metabolites	Caucasian	SNPs from the MHC (chr6 26M~34M) region was removed for this traits	NA	NA	NA	NA	NA	NA	NA	NA	NA	NA
Achilles_ldsc3.txt	Total cholesterol in IDL	27005778	metabolites	Caucasian	SNPs from the MHC (chr6 26M~34M) region was removed for this traits	NA	NA	NA	NA	NA	NA	NA	NA	NA	NA
Achilles_ldsc3.txt	Free cholesterol in IDL	27005778	metabolites	Caucasian	SNPs from the MHC (chr6 26M~34M) region was removed for this traits	NA	NA	NA	NA	NA	NA	NA	NA	NA	NA
Achilles_ldsc3.txt	Total lipids in IDL	27005778	metabolites	Caucasian	SNPs from the MHC (chr6 26M~34M) region was removed for this traits	NA	NA	NA	NA	NA	NA	NA	NA	NA	NA
Achilles_ldsc3.txt	Concentration of IDL particles	27005778	metabolites	Caucasian	SNPs from the MHC (chr6 26M~34M) region was removed for this traits	NA	NA	NA	NA	NA	NA	NA	NA	NA	NA
Achilles_ldsc3.txt	Phospholipids in IDL	27005778	metabolites	Caucasian	SNPs from the MHC (chr6 26M~34M) region was removed for this traits	NA	NA	NA	NA	NA	NA	NA	NA	NA	NA
Achilles_ldsc3.txt	Triglycerides in IDL	27005778	metabolites	Caucasian	SNPs from the MHC (chr6 26M~34M) region was removed for this traits	NA	NA	NA	NA	NA	NA	NA	NA	NA	NA
Achilles_ldsc3.txt	Isoleucine	27005778	metabolites	Caucasian	SNPs from the MHC (chr6 26M~34M) region was removed for this traits	NA	NA	NA	NA	NA	NA	NA	NA	NA	NA
Achilles_ldsc3.txt	Total cholesterol in large HDL	27005778	metabolites	Caucasian	SNPs from the MHC (chr6 26M~34M) region was removed for this traits	NA	NA	NA	NA	NA	NA	NA	NA	NA	NA
Achilles_ldsc3.txt	Cholesterol esters in large HDL	27005778	metabolites	Caucasian	SNPs from the MHC (chr6 26M~34M) region was removed for this traits	NA	NA	NA	NA	NA	NA	NA	NA	NA	NA
Achilles_ldsc3.txt	Free cholesterol in large HDL	27005778	metabolites	Caucasian	SNPs from the MHC (chr6 26M~34M) region was removed for this traits	NA	NA	NA	NA	NA	NA	NA	NA	NA	NA
Achilles_ldsc3.txt	Total lipids in large HDL	27005778	metabolites	Caucasian	SNPs from the MHC (chr6 26M~34M) region was removed for this traits	NA	NA	NA	NA	NA	NA	NA	NA	NA	NA
Achilles_ldsc3.txt	Concentration of large HDL particles	27005778	metabolites	Caucasian	SNPs from the MHC (chr6 26M~34M) region was removed for this traits	NA	NA	NA	NA	NA	NA	NA	NA	NA	NA
Achilles_ldsc3.txt	Phospholipids in large HDL	27005778	metabolites	Caucasian	SNPs from the MHC (chr6 26M~34M) region was removed for this traits	NA	NA	NA	NA	NA	NA	NA	NA	NA	NA
Achilles_ldsc3.txt	Total cholesterol in large LDL	27005778	metabolites	Caucasian	SNPs from the MHC (chr6 26M~34M) region was removed for this traits	NA	NA	NA	NA	NA	NA	NA	NA	NA	NA
Achilles_ldsc3.txt	Cholesterol esters in large VLDL	27005778	metabolites	Caucasian	SNPs from the MHC (chr6 26M~34M) region was removed for this traits	NA	NA	NA	NA	NA	NA	NA	NA	NA	NA
Achilles_ldsc3.txt	Free cholesterol in large LDL	27005778	metabolites	Caucasian	SNPs from the MHC (chr6 26M~34M) region was removed for this traits	NA	NA	NA	NA	NA	NA	NA	NA	NA	NA
Achilles_ldsc3.txt	Total lipids in large LDL	27005778	metabolites	Caucasian	SNPs from the MHC (chr6 26M~34M) region was removed for this traits	NA	NA	NA	NA	NA	NA	NA	NA	NA	NA
Achilles_ldsc3.txt	Concentration of large LDL particles	27005778	metabolites	Caucasian	SNPs from the MHC (chr6 26M~34M) region was removed for this traits	NA	NA	NA	NA	NA	NA	NA	NA	NA	NA
Achilles_ldsc3.txt	Phospholipids in large LDL	27005778	metabolites	Caucasian	SNPs from the MHC (chr6 26M~34M) region was removed for this traits	NA	NA	NA	NA	NA	NA	NA	NA	NA	NA
Achilles_ldsc3.txt	Total cholesterol in large VLDL	27005778	metabolites	Caucasian	SNPs from the MHC (chr6 26M~34M) region was removed for this traits	NA	NA	NA	NA	NA	NA	NA	NA	NA	NA
Achilles_ldsc3.txt	Cholesterol esters in large VLDL	27005778	metabolites	Caucasian	SNPs from the MHC (chr6 26M~34M) region was removed for this traits	NA	NA	NA	NA	NA	NA	NA	NA	NA	NA
Achilles_ldsc3.txt	Free cholesterol in large VLDL	27005778	metabolites	Caucasian	SNPs from the MHC (chr6 26M~34M) region was removed for this traits	NA	NA	NA	NA	NA	NA	NA	NA	NA	NA
Achilles_ldsc3.txt	Total lipids in large VLDL	27005778	metabolites	Caucasian	SNPs from the MHC (chr6 26M~34M) region was removed for this traits	NA	NA	NA	NA	NA	NA	NA	NA	NA	NA
Achilles_ldsc3.txt	Concentration of large VLDL particles	27005778	metabolites	Caucasian	SNPs from the MHC (chr6 26M~34M) region was removed for this traits	NA	NA	NA	NA	NA	NA	NA	NA	NA	NA
Achilles_ldsc3.txt	Phospholipids in large VLDL	27005778	metabolites	Caucasian	SNPs from the MHC (chr6 26M~34M) region was removed for this traits	NA	NA	NA	NA	NA	NA	NA	NA	NA	NA
Achilles_ldsc3.txt	Triglycerides in large VLDL	27005778	metabolites	Caucasian	SNPs from the MHC (chr6 26M~34M) region was removed for this traits	NA	NA	NA	NA	NA	NA	NA	NA	NA	NA
Achilles_ldsc3.txt	18:2; linoleic acid (LA)	27005778	metabolites	Caucasian	SNPs from the MHC (chr6 26M~34M) region was removed for this traits	NA	NA	NA	NA	NA	NA	NA	NA	NA	NA
Achilles_ldsc3.txt	Total cholesterol in LDL	27005778	metabolites	Caucasian	SNPs from the MHC (chr6 26M~34M) region was removed for this traits	NA	NA	NA	NA	NA	NA	NA	NA	NA	NA
Achilles_ldsc3.txt	Mean diameter for LDL particles	27005778	metabolites	Caucasian	Caution: using this data may yield results outside bounds due to relative low Z score of the SNP heritability of the trait; SNPs from the MHC (chr6 26M~34M) region was removed for this traits	NA	NA	NA	NA	NA	NA	NA	NA	NA	NA
Achilles_ldsc3.txt	Leucine	27005778	metabolites	Caucasian	Caution: using this data may yield results outside bounds due to relative low Z score of the SNP heritability of the trait; SNPs from the MHC (chr6 26M~34M) region was removed for this traits	NA	NA	NA	NA	NA	NA	NA	NA	NA	NA
Achilles_ldsc3.txt	Total cholesterol in medium HDL	27005778	metabolites	Caucasian	Caution: using this data may yield results outside bounds due to relative low Z score of the SNP heritability of the trait; SNPs from the MHC (chr6 26M~34M) region was removed for this traits	NA	NA	NA	NA	NA	NA	NA	NA	NA	NA
Achilles_ldsc3.txt	Cholesterol esters in medium HDL	27005778	metabolites	Caucasian	Caution: using this data may yield results outside bounds due to relative low Z score of the SNP heritability of the trait; SNPs from the MHC (chr6 26M~34M) region was removed for this traits	NA	NA	NA	NA	NA	NA	NA	NA	NA	NA
Achilles_ldsc3.txt	Free cholesterol in medium HDL	27005778	metabolites	Caucasian	SNPs from the MHC (chr6 26M~34M) region was removed for this traits	NA	NA	NA	NA	NA	NA	NA	NA	NA	NA
Achilles_ldsc3.txt	Total lipids in medium HDL	27005778	metabolites	Caucasian	Caution: using this data may yield results outside bounds due to relative low Z score of the SNP heritability of the trait; SNPs from the MHC (chr6 26M~34M) region was removed for this traits	NA	NA	NA	NA	NA	NA	NA	NA	NA	NA
Achilles_ldsc3.txt	Concentration of medium HDL particles	27005778	metabolites	Caucasian	Caution: using this data may yield results outside bounds due to relative low Z score of the SNP heritability of the trait; SNPs from the MHC (chr6 26M~34M) region was removed for this traits	NA	NA	NA	NA	NA	NA	NA	NA	NA	NA
Achilles_ldsc3.txt	Phospholipids in medium HDL	27005778	metabolites	Caucasian	SNPs from the MHC (chr6 26M~34M) region was removed for this traits	NA	NA	NA	NA	NA	NA	NA	NA	NA	NA
Achilles_ldsc3.txt	Total cholesterol in medium LDL	27005778	metabolites	Caucasian	SNPs from the MHC (chr6 26M~34M) region was removed for this traits	NA	NA	NA	NA	NA	NA	NA	NA	NA	NA
Achilles_ldsc3.txt	Cholesterol esters in medium LDL	27005778	metabolites	Caucasian	SNPs from the MHC (chr6 26M~34M) region was removed for this traits	NA	NA	NA	NA	NA	NA	NA	NA	NA	NA
Achilles_ldsc3.txt	Total lipids in medium LDL	27005778	metabolites	Caucasian	SNPs from the MHC (chr6 26M~34M) region was removed for this traits	NA	NA	NA	NA	NA	NA	NA	NA	NA	NA
Achilles_ldsc3.txt	Concentration of medium LDL particles	27005778	metabolites	Caucasian	SNPs from the MHC (chr6 26M~34M) region was removed for this traits	NA	NA	NA	NA	NA	NA	NA	NA	NA	NA
Achilles_ldsc3.txt	Phospholipids in medium LDL	27005778	metabolites	Caucasian	SNPs from the MHC (chr6 26M~34M) region was removed for this traits	NA	NA	NA	NA	NA	NA	NA	NA	NA	NA
Achilles_ldsc3.txt	Total cholesterol in medium VLDL	27005778	metabolites	Caucasian	SNPs from the MHC (chr6 26M~34M) region was removed for this traits	NA	NA	NA	NA	NA	NA	NA	NA	NA	NA
Achilles_ldsc3.txt	Cholesterol esters in medium VLDL	27005778	metabolites	Caucasian	SNPs from the MHC (chr6 26M~34M) region was removed for this traits	NA	NA	NA	NA	NA	NA	NA	NA	NA	NA
Achilles_ldsc3.txt	Free cholesterol in medium VLDL	27005778	metabolites	Caucasian	SNPs from the MHC (chr6 26M~34M) region was removed for this traits	NA	NA	NA	NA	NA	NA	NA	NA	NA	NA
Achilles_ldsc3.txt	Total lipids in medium VLDL	27005778	metabolites	Caucasian	SNPs from the MHC (chr6 26M~34M) region was removed for this traits	NA	NA	NA	NA	NA	NA	NA	NA	NA	NA
Achilles_ldsc3.txt	Concentration of medium VLDL particles	27005778	metabolites	Caucasian	SNPs from the MHC (chr6 26M~34M) region was removed for this traits	NA	NA	NA	NA	NA	NA	NA	NA	NA	NA
Achilles_ldsc3.txt	Phospholipids in medium VLDL	27005778	metabolites	Caucasian	SNPs from the MHC (chr6 26M~34M) region was removed for this traits	NA	NA	NA	NA	NA	NA	NA	NA	NA	NA
Achilles_ldsc3.txt	Triglycerides in medium VLDL	27005778	metabolites	Caucasian	SNPs from the MHC (chr6 26M~34M) region was removed for this traits	NA	NA	NA	NA	NA	NA	NA	NA	NA	NA
Achilles_ldsc3.txt	Mono-unsaturated fatty acids	27005778	metabolites	Caucasian	Caution: using this data may yield results outside bounds due to relative low Z score of the SNP heritability of the trait; SNPs from the MHC (chr6 26M~34M) region was removed for this traits	NA	NA	NA	NA	NA	NA	NA	NA	NA	NA
Achilles_ldsc3.txt	Phenylalanine	27005778	metabolites	Caucasian	Caution: using this data may yield results outside bounds due to relative low Z score of the SNP heritability of the trait; SNPs from the MHC (chr6 26M~34M) region was removed for this traits	NA	NA	NA	NA	NA	NA	NA	NA	NA	NA
Achilles_ldsc3.txt	Total lipids in small HDL	27005778	metabolites	Caucasian	Caution: using this data may yield results outside bounds due to relative low Z score of the SNP heritability of the trait; SNPs from the MHC (chr6 26M~34M) region was removed for this traits	NA	NA	NA	NA	-0.0016	0.0642	1.0165	0.0173	-0.0165	0.0131
Achilles_ldsc3.txt	Triglycerides in small HDL	27005778	metabolites	Caucasian	Caution: using this data may yield results outside bounds due to relative low Z score of the SNP heritability of the trait; SNPs from the MHC (chr6 26M~34M) region was removed for this traits	NA	NA	NA	NA	NA	NA	NA	NA	NA	NA
Achilles_ldsc3.txt	Total cholesterol in small LDL	27005778	metabolites	Caucasian	SNPs from the MHC (chr6 26M~34M) region was removed for this traits	NA	NA	NA	NA	NA	NA	NA	NA	NA	NA
Achilles_ldsc3.txt	Total lipids in small LDL	27005778	metabolites	Caucasian	SNPs from the MHC (chr6 26M~34M) region was removed for this traits	NA	NA	NA	NA	NA	NA	NA	NA	NA	NA
Achilles_ldsc3.txt	Concentration of small LDL particles	27005778	metabolites	Caucasian	SNPs from the MHC (chr6 26M~34M) region was removed for this traits	NA	NA	NA	NA	NA	NA	NA	NA	NA	NA
Achilles_ldsc3.txt	Total cholesterol in small VLDL	27005778	metabolites	Caucasian	SNPs from the MHC (chr6 26M~34M) region was removed for this traits	NA	NA	NA	NA	NA	NA	NA	NA	NA	NA
Achilles_ldsc3.txt	Free cholesterol in small VLDL	27005778	metabolites	Caucasian	SNPs from the MHC (chr6 26M~34M) region was removed for this traits	NA	NA	NA	NA	NA	NA	NA	NA	NA	NA
Achilles_ldsc3.txt	Total lipids in small VLDL	27005778	metabolites	Caucasian	SNPs from the MHC (chr6 26M~34M) region was removed for this traits	NA	NA	NA	NA	NA	NA	NA	NA	NA	NA
Achilles_ldsc3.txt	Concentration of small VLDL particles	27005778	metabolites	Caucasian	SNPs from the MHC (chr6 26M~34M) region was removed for this traits	NA	NA	NA	NA	NA	NA	NA	NA	NA	NA
Achilles_ldsc3.txt	Phospholipids in small VLDL	27005778	metabolites	Caucasian	SNPs from the MHC (chr6 26M~34M) region was removed for this traits	NA	NA	NA	NA	NA	NA	NA	NA	NA	NA
Achilles_ldsc3.txt	Triglycerides in small VLDL	27005778	metabolites	Caucasian	SNPs from the MHC (chr6 26M~34M) region was removed for this traits	NA	NA	NA	NA	NA	NA	NA	NA	NA	NA
Achilles_ldsc3.txt	Serum total cholesterol	27005778	metabolites	Caucasian	Caution: using this data may yield results outside bounds due to relative low Z score of the SNP heritability of the trait; SNPs from the MHC (chr6 26M~34M) region was removed for this traits	NA	NA	NA	NA	NA	NA	NA	NA	NA	NA
Achilles_ldsc3.txt	Serum total triglycerides	27005778	metabolites	Caucasian	SNPs from the MHC (chr6 26M~34M) region was removed for this traits	NA	NA	NA	NA	NA	NA	NA	NA	NA	NA
Achilles_ldsc3.txt	Tyrosine	27005778	metabolites	Caucasian	Caution: using this data may yield results outside bounds due to relative low Z score of the SNP heritability of the trait; SNPs from the MHC (chr6 26M~34M) region was removed for this traits	NA	NA	NA	NA	NA	NA	NA	NA
Achilles_ldsc3.txt	Valine	27005778	metabolites	Caucasian	SNPs from the MHC (chr6 26M~34M) region was removed for this traits	NA	NA	NA	NA	-0.0135	0.0501	1.0325	0.0234	0.0095	0.0122
Achilles_ldsc3.txt	Mean diameter for VLDL particles	27005778	metabolites	Caucasian	SNPs from the MHC (chr6 26M~34M) region was removed for this traits	NA	NA	NA	NA	NA	NA	NA	NA	NA	NA
Achilles_ldsc3.txt	Total cholesterol in very large HDL	27005778	metabolites	Caucasian	Caution: using this data may yield results outside bounds due to relative low Z score of the SNP heritability of the trait; SNPs from the MHC (chr6 26M~34M) region was removed for this traits	NA	NA	NA	NA	-0.0166	0.0582	1.0332	0.0222	0.0036	0.0122
Achilles_ldsc3.txt	Free cholesterol in very large HDL	27005778	metabolites	Caucasian	Caution: using this data may yield results outside bounds due to relative low Z score of the SNP heritability of the trait; SNPs from the MHC (chr6 26M~34M) region was removed for this traits	NA	NA	NA	NA	-0.0063	0.0555	1.034	0.0218	0.0057	0.0123
Achilles_ldsc3.txt	Total lipids in very large HDL	27005778	metabolites	Caucasian	Caution: using this data may yield results outside bounds due to relative low Z score of the SNP heritability of the trait; SNPs from the MHC (chr6 26M~34M) region was removed for this traits	NA	NA	NA	NA	-0.0181	0.0604	1.0326	0.0219	0.0008	0.0127
Achilles_ldsc3.txt	Concentration of very large HDL particles	27005778	metabolites	Caucasian	Caution: using this data may yield results outside bounds due to relative low Z score of the SNP heritability of the trait; SNPs from the MHC (chr6 26M~34M) region was removed for this traits	NA	NA	NA	NA	NA	NA	NA	NA	NA	NA
Achilles_ldsc3.txt	Phospholipids in very large HDL	27005778	metabolites	Caucasian	SNPs from the MHC (chr6 26M~34M) region was removed for this traits	NA	NA	NA	NA	-0.0064	0.0587	1.0199	0.0207	0.0034	0.0126
Achilles_ldsc3.txt	Triglycerides in very large HDL	27005778	metabolites	Caucasian	Caution: using this data may yield results outside bounds due to relative low Z score of the SNP heritability of the trait; SNPs from the MHC (chr6 26M~34M) region was removed for this traits	NA	NA	NA	NA	NA	NA	NA	NA	NA	NA
Achilles_ldsc3.txt	Total lipids in very large VLDL	27005778	metabolites	Caucasian	SNPs from the MHC (chr6 26M~34M) region was removed for this traits	NA	NA	NA	NA	NA	NA	NA	NA	NA	NA
Achilles_ldsc3.txt	Concentration of very large VLDL particles	27005778	metabolites	Caucasian	SNPs from the MHC (chr6 26M~34M) region was removed for this traits	NA	NA	NA	NA	NA	NA	NA	NA	NA	NA
Achilles_ldsc3.txt	Phospholipids in very large VLDL	27005778	metabolites	Caucasian	SNPs from the MHC (chr6 26M~34M) region was removed for this traits	NA	NA	NA	NA	NA	NA	NA	NA	NA	NA
Achilles_ldsc3.txt	Triglycerides in very large VLDL	27005778	metabolites	Caucasian	SNPs from the MHC (chr6 26M~34M) region was removed for this traits	NA	NA	NA	NA	NA	NA	NA	NA	NA	NA
Achilles_ldsc3.txt	Total lipids in very small VLDL	27005778	metabolites	Caucasian	SNPs from the MHC (chr6 26M~34M) region was removed for this traits	NA	NA	NA	NA	NA	NA	NA	NA	NA	NA
Achilles_ldsc3.txt	Concentration of very small VLDL particles	27005778	metabolites	Caucasian	SNPs from the MHC (chr6 26M~34M) region was removed for this traits	NA	NA	NA	NA	NA	NA	NA	NA	NA	NA
Achilles_ldsc3.txt	Phospholipids in very small VLDL	27005778	metabolites	Caucasian	SNPs from the MHC (chr6 26M~34M) region was removed for this traits	NA	NA	NA	NA	NA	NA	NA	NA	NA	NA
Achilles_ldsc3.txt	Triglycerides in very small VLDL	27005778	metabolites	Caucasian	SNPs from the MHC (chr6 26M~34M) region was removed for this traits	NA	NA	NA	NA	NA	NA	NA	NA	NA	NA
Achilles_ldsc3.txt	Total lipids in chylomicrons and largest VLDL particles	27005778	metabolites	Caucasian	SNPs from the MHC (chr6 26M~34M) region was removed for this traits	NA	NA	NA	NA	NA	NA	NA	NA	NA	NA
Achilles_ldsc3.txt	Concentration of chylomicrons and largest VLDL particles	27005778	metabolites	Caucasian	SNPs from the MHC (chr6 26M~34M) region was removed for this traits	NA	NA	NA	NA	NA	NA	NA	NA	NA	NA
Achilles_ldsc3.txt	Phospholipids in chylomicrons and largest VLDL particles	27005778	metabolites	Caucasian	SNPs from the MHC (chr6 26M~34M) region was removed for this traits	NA	NA	NA	NA	NA	NA	NA	NA	NA	NA
Achilles_ldsc3.txt	Triglycerides in chylomicrons and largest VLDL particles	27005778	metabolites	Caucasian	SNPs from the MHC (chr6 26M~34M) region was removed for this traits	NA	NA	NA	NA	NA	NA	NA	NA	NA	NA
Achilles_ldsc3.txt	Triglycerides	20686565	lipids	Caucasian	SNPs from the MHC (chr6 26M~34M) region was removed for this traits	NA	NA	NA	NA	NA	NA	NA	NA	NA	NA
Achilles_ldsc3.txt	Total Cholesterol	20686565	lipids	Caucasian	SNPs from the MHC (chr6 26M~34M) region was removed for this traits	NA	NA	NA	NA	NA	NA	NA	NA	NA	NA
Achilles_ldsc3.txt	waist circumference	25673412	anthropometric	Caucasian	SNPs from the MHC (chr6 26M~34M) region was removed for this traits	NA	NA	NA	NA	NA	NA	NA	NA	NA	NA
Achilles_ldsc3.txt	waist-to-hip ratio	25673412	anthropometric	Caucasian	SNPs from the MHC (chr6 26M~34M) region was removed for this traits	NA	NA	NA	NA	NA	NA	NA	NA	NA	NA
Achilles_ldsc3.txt	Body fat	26833246	anthropometric	mixed	Caution: using this data may yield results outside bounds due to relative low Z score of the SNP heritability of the trait; using this data may yield less robust results due to minor departure of the LD structure; SNPs from the MHC (chr6 26M~34M) region was removed for this traitsCaution: using this data may yield less robust results due to minor departure of the LD structure; SNPs from the MHC (…	NA	NA	NA	NA	NA	NA	NA	NA	NA	NA
Achilles_ldsc3.txt	Depressive symptoms	27089181	psychiatric	Caucasian	SNPs from the MHC (chr6 26M~34M) region was removed for this traits	NA	NA	NA	NA	NA	NA	NA	NA	NA	NA
Achilles_ldsc3.txt	Mean Accumbens	25607358	brain_volumn	Caucasian	Caution: using this data may yield results outside bounds due to relative low Z score of the SNP heritability of the trait	SNPs from the MHC (chr6 26M~34M) region was removed for this traits	NA	NA	NA	NA	-0.1297	0.0862	1.0144	0.018	0.0116	0.0129
Achilles_ldsc3.txt	Forearm Bone mineral density	26367794	bone	mixed	Caution: using this data may yield results outside bounds due to relative low Z score of the SNP heritability of the trait; using this data may yield less robust results due to minor departure of the LD structure; SNPs from the MHC (chr6 26M~34M) region was removed for this traits	NA	NA	NA	NA	-0.0345	0.1089	1.0341	0.0197	0.0064	0.0125
Achilles_ldsc3.txt	Forced expiratory volume in 1 second (FEV1)	21946350	lung_function	Caucasian	SNPs from the MHC (chr6 26M~34M) region was removed for this traits	NA	NA	NA	NA	NA	NA	NA	NA	NA	NA
Achilles_ldsc3.txt	Forced expiratory volume in 1 second (FEV1)/Forced Vital capacity(FVC)	21946350	lung_function	Caucasian	SNPs from the MHC (chr6 26M~34M) region was removed for this traits	NA	NA	NA	NA	NA	NA	NA	NA	NA	NA
Achilles_ldsc3.txt	Leptin_adjBMI	26833098	hormone	Caucasian	SNPs from the MHC (chr6 26M~34M) region was removed for this traits	NA	NA	NA	NA	NA	NA	NA	NA	NA	NA
Achilles_ldsc3.txt	Leptin_not_adjBMI	26833098	hormone	Caucasian	SNPs from the MHC (chr6 26M~34M) region was removed for this traits	NA	NA	NA	NA	NA	NA	NA	NA	NA	NA
Achilles_ldsc3.txt	Age at Menopause	26414677	reproductive	Caucasian	SNPs from the MHC (chr6 26M~34M) region was removed for this traits	NA	NA	NA	NA	NA	NA	NA	NA	NA	NA
Achilles_ldsc3.txt	Heart rate	23583979	cardiometabolic	mixed	Caution: using this data may yield less robust results due to minor departure of the LD structure; SNPs from the MHC (chr6 26M~34M) region was removed for this traits	NA	NA	NA	NA	NA	NA	NA	NA	NA	NA
Achilles_ldsc3.txt	Mean platelet volume	22139419	haemotological	Caucasian	SNPs from the MHC (chr6 26M~34M) region was removed for this traits	NA	NA	NA	NA	NA	NA	NA	NA	NA	NA
Achilles_ldsc3.txt	Neuroticism	27089181	psychiatric	Caucasian	SNPs from the MHC (chr6 26M~34M) region was removed for this traits	NA	NA	NA	NA	NA	NA	NA	NA	NA	NA
Achilles_ldsc3.txt	platelet count	22139419	haemotological	Caucasian	SNPs from the MHC (chr6 26M~34M) region was removed for this traits	NA	NA	NA	NA	NA	NA	NA	NA	NA	NA
Achilles_ldsc3.txt	Subjective well being	27089181	psychiatric	Caucasian	SNPs from the MHC (chr6 26M~34M) region was removed for this traits	NA	NA	NA	NA	NA	NA	NA	NA	NA	NA
Achilles_ldsc3.txt	Lung cancer (all)	24880342	cancer	Caucasian	SNPs from the MHC (chr6 26M~34M) region was removed for this traits	NA	NA	NA	NA	NA	NA	NA	NA	NA	NA
Achilles_ldsc3.txt	Lung cancer (squamous cell)	24880342	cancer	Caucasian	Caution: using this data may yield results outside bounds due to relative low Z score of the SNP heritability of the trait; SNPs from the MHC (chr6 26M~34M) region was removed for this traits	NA	NA	NA	NA	NA	NA	NA	NA	NA	NA
Genetic correlation results for ACL rupture
rg = genetic correlation
se = standard error of rg
p = p-value for rg
h2_obs, h2_obs_se = observed scale h2 for trait 2 and standard error
h2_int, h2_int_se = single-trait LD Score regression intercept for trait 2 and standard error
gcov_int, gcov_int_se = cross-trait LD Score regression intercept and standard error.
trait1	trait2	PMID	Category	ethnicity	note	rg	se	z	p	h2_obs	h2_obs_se	h2_int	h2_int_se	gcov_int	gcov_int_se
ACL_join	Type 2 Diabetes	22885922	glycemic	Caucasian	SNPs from the MHC (chr6 26M~34M) region was removed for this traits	-1.0209	0.5409	-1.8874	0.0591	0.0629	0.019	0.9883	0.0186	0.0303	0.0128
ACL_join	Heart rate	23583979	cardiometabolic	mixed	Caution: using this data may yield less robust results due to minor departure of the LD structure; SNPs from the MHC (chr6 26M~34M) region was removed for this traits	-0.4716	0.3165	-1.4898	0.1363	0.0926	0.0176	0.994	0.0207	0.0112	0.0117
ACL_join	Major depressive disorder	22472876	psychiatric	Caucasian	SNPs from the MHC (chr6 26M~34M) region was removed for this traits	-0.6128	0.4601	-1.3319	0.1829	0.2447	0.0733	1.0019	0.0187	0.0108	0.0121
ACL_join	Body fat	26833246	anthropometric	mixed	Caution: using this data may yield results outside bounds due to relative low Z score of the SNP heritability of the trait; using this data may yield less robust results due to minor departure of the LD structure; SNPs from the MHC (chr6 26M~34M) region was removed for this traitsCaution: using this data may yield less robust results due to minor departure of the LD structure; SNPs from the MHC (…	0.3734	0.2914	1.2816	0.2	0.135	0.0243	0.8668	0.0217	-0.0452	0.0131
ACL_join	Forced expiratory volume in 1 second (FEV1)	21946350	lung_function	Caucasian	SNPs from the MHC (chr6 26M~34M) region was removed for this traits	0.5935	0.4716	1.2585	0.2082	0.1045	0.0313	0.9048	0.0182	-0.0239	0.0141
ACL_join	Former vs Current smoker	20418890	smoking_behaviour	Caucasian	SNPs from the MHC (chr6 26M~34M) region was removed for this traits	-0.8281	0.6617	-1.2514	0.2108	0.0449	0.0331	1.0265	0.0185	0.0136	0.0108
ACL_join	overweight	23563607	anthropometric	Caucasian	SNPs from the MHC (chr6 26M~34M) region was removed for this traits	-0.2648	0.2121	-1.2482	0.212	0.1415	0.0203	0.9874	0.0267	-0.0021	0.0146
ACL_join	child birth weight	23202124	anthropometric	Caucasian	SNPs from the MHC (chr6 26M~34M) region was removed for this traits	0.578	0.4765	1.2131	0.2251	0.0977	0.0457	0.999	0.0167	-0.0137	0.0116
ACL_join	body mass index	20935630	anthropometric	Caucasian	SNPs from the MHC (chr6 26M~34M) region was removed for this traits	-0.2335	0.2001	-1.1669	0.2433	0.2299	0.0295	0.9541	0.0265	-0.003	0.0141
ACL_join	Total cholesterol in large VLDL	27005778	metabolites	Caucasian	SNPs from the MHC (chr6 26M~34M) region was removed for this traits	0.6553	0.5694	1.151	0.2497	0.2356	0.1296	0.9664	0.0243	-0.0192	0.0115
ACL_join	Total cholesterol in small VLDL	27005778	metabolites	Caucasian	SNPs from the MHC (chr6 26M~34M) region was removed for this traits	0.5125	0.4617	1.1101	0.267	0.2513	0.0966	0.9904	0.0297	-0.0149	0.0119
ACL_join	Phenylalanine	27005778	metabolites	Caucasian	Caution: using this data may yield results outside bounds due to relative low Z score of the SNP heritability of the trait; SNPs from the MHC (chr6 26M~34M) region was removed for this traits	1.016	0.916	1.1092	0.2673	0.0665	0.0523	0.9823	0.0189	-0.0163	0.0113
ACL_join	Acetoacetate	27005778	metabolites	Caucasian	Caution: using this data may yield results outside bounds due to relative low Z score of the SNP heritability of the trait; SNPs from the MHC (chr6 26M~34M) region was removed for this traits	0.9686	0.877	1.1044	0.2694	0.075	0.0631	0.975	0.0173	-0.0054	0.0123
ACL_join	obesity class 1	23563607	anthropometric	Caucasian	SNPs from the MHC (chr6 26M~34M) region was removed for this traits	-0.2425	0.2225	-1.0897	0.2758	0.2508	0.0359	0.984	0.029	-0.0014	0.017
ACL_join	Phospholipids in small VLDL	27005778	metabolites	Caucasian	SNPs from the MHC (chr6 26M~34M) region was removed for this traits	0.4749	0.4379	1.0846	0.2781	0.3077	0.1265	0.9714	0.03	-0.0164	0.0113
ACL_join	Schizophrenia	25056061	psychiatric	mixed	Caution: using this data may yield less robust results due to minor departure of the LD structure; SNPs from the MHC (chr6 26M~34M) region was removed for this traits	-0.2082	0.1966	-1.0586	0.2898	0.4831	0.0504	1.0238	0.0373	0.0155	0.0187
ACL_join	Cholesterol esters in medium HDL	27005778	metabolites	Caucasian	Caution: using this data may yield results outside bounds due to relative low Z score of the SNP heritability of the trait; SNPs from the MHC (chr6 26M~34M) region was removed for this traits	-0.6608	0.6338	-1.0426	0.2971	0.1262	0.0753	0.9833	0.02	0.0066	0.012
ACL_join	serum cystatin c	26831199	kidney	mixed	Caution: using this data may yield less robust results due to minor departure of the LD structure; SNPs from the MHC (chr6 26M~34M) region was removed for this traits	0.5564	0.5437	1.0233	0.3061	0.1207	0.0508	0.9555	0.0228	-0.0186	0.0129
ACL_join	Omega-3 fatty acids	27005778	metabolites	Caucasian	SNPs from the MHC (chr6 26M~34M) region was removed for this traits	0.4916	0.4804	1.0233	0.3062	0.3328	0.1325	0.9691	0.0226	-0.0212	0.0123
ACL_join	Cholesterol esters in medium VLDL	27005778	metabolites	Caucasian	SNPs from the MHC (chr6 26M~34M) region was removed for this traits	0.4106	0.4081	1.0062	0.3143	0.3287	0.1224	0.9583	0.027	-0.0179	0.0116
ACL_join	Parkinsons disease	19915575	psychiatric	Caucasian	SNPs from the MHC (chr6 26M~34M) region was removed for this traits	0.8366	0.8377	0.9987	0.318	0.2061	0.2662	1.1115	0.027	-0.0235	0.0114
ACL_join	Total lipids in medium HDL	27005778	metabolites	Caucasian	Caution: using this data may yield results outside bounds due to relative low Z score of the SNP heritability of the trait; SNPs from the MHC (chr6 26M~34M) region was removed for this traits	-0.5383	0.54	-0.9967	0.3189	0.1528	0.0765	0.9691	0.0188	0.0009	0.012
ACL_join	Concentration of medium HDL particles	27005778	metabolites	Caucasian	Caution: using this data may yield results outside bounds due to relative low Z score of the SNP heritability of the trait; SNPs from the MHC (chr6 26M~34M) region was removed for this traits	-0.4982	0.5084	-0.98	0.3271	0.1653	0.0784	0.9641	0.0187	-0.0005	0.0119
ACL_join	Lung cancer (all)	24880342	cancer	Caucasian	SNPs from the MHC (chr6 26M~34M) region was removed for this traits	-0.56	0.5769	-0.9707	0.3317	0.1897	0.0535	0.9906	0.0198	0.0134	0.0132
ACL_join	years of schooling	23722424	education	Caucasian	SNPs from the MHC (chr6 26M~34M) region was removed for this traits	0.2533	0.2613	0.9691	0.3325	0.0943	0.0193	1.0165	0.0271	-0.0118	0.0147
ACL_join	Triglycerides in small HDL	27005778	metabolites	Caucasian	Caution: using this data may yield results outside bounds due to relative low Z score of the SNP heritability of the trait; SNPs from the MHC (chr6 26M~34M) region was removed for this traits	0.7158	0.7526	0.9511	0.3415	0.0888	0.0724	0.9872	0.0229	-0.0145	0.0109
ACL_join	Phospholipids in medium VLDL	27005778	metabolites	Caucasian	SNPs from the MHC (chr6 26M~34M) region was removed for this traits	0.3919	0.4144	0.9459	0.3442	0.2913	0.1255	0.9602	0.0267	-0.0148	0.011
ACL_join	Total cholesterol in medium VLDL	27005778	metabolites	Caucasian	SNPs from the MHC (chr6 26M~34M) region was removed for this traits	0.3768	0.4027	0.9358	0.3494	0.3263	0.1305	0.9553	0.028	-0.0184	0.0112
ACL_join	fasting glucose main effect	22581228	glycemic	Caucasian	SNPs from the MHC (chr6 26M~34M) region was removed for this traits	-0.2645	0.2836	-0.9327	0.351	0.0978	0.055	0.9705	0.0313	-0.0073	0.0121
ACL_join	Total lipids in very small VLDL	27005778	metabolites	Caucasian	SNPs from the MHC (chr6 26M~34M) region was removed for this traits	0.3616	0.3879	0.9321	0.3513	0.3357	0.1226	0.9697	0.0315	-0.0127	0.0115
ACL_join	Age at Menopause	26414677	reproductive	Caucasian	SNPs from the MHC (chr6 26M~34M) region was removed for this traits	0.2478	0.269	0.9211	0.357	0.1851	0.0423	0.9426	0.0293	-0.0168	0.0143
ACL_join	Neuroticism	24828478	personality	Caucasian	SNPs from the MHC (chr6 26M~34M) region was removed for this traits	-0.5817	0.6438	-0.9036	0.3662	0.0156	0.0075	1.0056	0.0169	-0.0032	0.0135
ACL_join	Autism spectrum disorder	0	psychiatric	Caucasian	SNPs from the MHC (chr6 26M~34M) region was removed for this traits	0.389	0.4322	0.9001	0.3681	0.4983	0.1439	0.958	0.0191	-0.0214	0.0125
ACL_join	Mean diameter for LDL particles	27005778	metabolites	Caucasian	Caution: using this data may yield results outside bounds due to relative low Z score of the SNP heritability of the trait; SNPs from the MHC (chr6 26M~34M) region was removed for this traits	0.8634	0.9811	0.8801	0.3788	0.0781	0.0723	0.9979	0.0191	0.001	0.0129
ACL_join	Free cholesterol in IDL	27005778	metabolites	Caucasian	SNPs from the MHC (chr6 26M~34M) region was removed for this traits	0.3801	0.4346	0.8746	0.3818	0.216	0.0845	1.0288	0.0412	-0.0137	0.0125
ACL_join	Concentration of very small VLDL particles	27005778	metabolites	Caucasian	SNPs from the MHC (chr6 26M~34M) region was removed for this traits	0.3318	0.3806	0.872	0.3832	0.3354	0.1252	0.9699	0.0317	-0.0121	0.0113
ACL_join	Free cholesterol in medium VLDL	27005778	metabolites	Caucasian	SNPs from the MHC (chr6 26M~34M) region was removed for this traits	0.3596	0.4131	0.8704	0.3841	0.2975	0.1307	0.96	0.027	-0.0136	0.0111
ACL_join	Phospholipids in very small VLDL	27005778	metabolites	Caucasian	SNPs from the MHC (chr6 26M~34M) region was removed for this traits	0.358	0.4131	0.8667	0.3861	0.2678	0.104	0.9999	0.036	-0.0124	0.0121
ACL_join	Neo-conscientiousness	21173776	personality	Caucasian	Caution: using this data may yield results outside bounds due to relative low Z score of the SNP heritability of the trait; SNPs from the MHC (chr6 26M~34M) region was removed for this traits	1.0321	1.1921	0.8658	0.3866	0.0648	0.082	1.0076	0.0202	-0.0122	0.0133
ACL_join	cognitive performance	25201988	education	Caucasian	SNPs from the MHC (chr6 26M~34M) region was removed for this traits	0.2264	0.2619	0.8643	0.3874	0.1285	0.0238	0.9965	0.0279	-0.015	0.0159
ACL_join	Total cholesterol in IDL	27005778	metabolites	Caucasian	SNPs from the MHC (chr6 26M~34M) region was removed for this traits	0.3717	0.4367	0.8511	0.3947	0.2191	0.09	1.0324	0.0424	-0.0106	0.012
ACL_join	Phospholipids in IDL	27005778	metabolites	Caucasian	SNPs from the MHC (chr6 26M~34M) region was removed for this traits	0.3765	0.4435	0.8489	0.396	0.2081	0.0882	1.0234	0.0396	-0.0151	0.0121
ACL_join	Isoleucine	27005778	metabolites	Caucasian	SNPs from the MHC (chr6 26M~34M) region was removed for this traits	0.4532	0.539	0.8408	0.4005	0.1073	0.0799	0.9746	0.0217	-0.0195	0.0116
ACL_join	Citrate	27005778	metabolites	Caucasian	SNPs from the MHC (chr6 26M~34M) region was removed for this traits	-0.7301	0.8705	-0.8387	0.4016	0.0568	0.0495	1.0028	0.0176	0.0124	0.0117
ACL_join	Total cholesterol in medium HDL	27005778	metabolites	Caucasian	Caution: using this data may yield results outside bounds due to relative low Z score of the SNP heritability of the trait; SNPs from the MHC (chr6 26M~34M) region was removed for this traits	-0.4804	0.5792	-0.8294	0.4069	0.1118	0.0651	0.9846	0.0188	0.0071	0.0116
ACL_join	Subjective well being	27089181	psychiatric	Caucasian	SNPs from the MHC (chr6 26M~34M) region was removed for this traits	0.3232	0.3989	0.8101	0.4179	0.0166	0.0049	1.0305	0.0205	-0.0049	0.0133
ACL_join	Free cholesterol in small VLDL	27005778	metabolites	Caucasian	SNPs from the MHC (chr6 26M~34M) region was removed for this traits	0.3151	0.3969	0.794	0.4272	0.2789	0.112	0.9766	0.0292	-0.0144	0.0116
ACL_join	HDL cholesterol	20686565	lipids	Caucasian	SNPs from the MHC (chr6 26M~34M) region was removed for this traits	-0.2027	0.2589	-0.7829	0.4337	0.1216	0.0231	1.0017	0.027	0.029	0.0155
ACL_join	Crohns disease	26192919	autoimmune	Caucasian	SNPs from the MHC (chr6 26M~34M) region was removed for this traits	0.2187	0.2798	0.7817	0.4344	0.5184	0.1369	1.0516	0.0314	-0.0282	0.0124
ACL_join	extreme waist-to-hip ratio	23563607	anthropometric	Caucasian	SNPs from the MHC (chr6 26M~34M) region was removed for this traits	0.2964	0.3797	0.7805	0.4351	0.8082	0.2012	0.9346	0.0265	-0.0049	0.0167
ACL_join	Neuroticism	27089181	psychiatric	Caucasian	SNPs from the MHC (chr6 26M~34M) region was removed for this traits	0.2507	0.3235	0.7749	0.4384	0.0865	0.011	0.984	0.0237	-0.0236	0.0166
ACL_join	Phospholipids in large LDL	27005778	metabolites	Caucasian	SNPs from the MHC (chr6 26M~34M) region was removed for this traits	0.4088	0.5324	0.7678	0.4426	0.1339	0.0761	1.0404	0.0403	-0.0102	0.0117
ACL_join	Free cholesterol in large VLDL	27005778	metabolites	Caucasian	SNPs from the MHC (chr6 26M~34M) region was removed for this traits	0.3179	0.4199	0.757	0.4491	0.2822	0.1184	0.9519	0.0244	-0.0187	0.0118
ACL_join	Total lipids in small VLDL	27005778	metabolites	Caucasian	SNPs from the MHC (chr6 26M~34M) region was removed for this traits	0.2969	0.3976	0.7469	0.4552	0.2872	0.1217	0.9688	0.0278	-0.0092	0.0113
ACL_join	Free cholesterol in large LDL	27005778	metabolites	Caucasian	SNPs from the MHC (chr6 26M~34M) region was removed for this traits	0.3776	0.5107	0.7393	0.4597	0.1435	0.0759	1.0411	0.0427	-0.0082	0.012
ACL_join	Phospholipids in very large VLDL	27005778	metabolites	Caucasian	SNPs from the MHC (chr6 26M~34M) region was removed for this traits	0.3079	0.4193	0.7344	0.4627	0.2749	0.1113	0.9419	0.0233	-0.0173	0.0122
ACL_join	Free cholesterol in medium HDL	27005778	metabolites	Caucasian	SNPs from the MHC (chr6 26M~34M) region was removed for this traits	-0.4252	0.5851	-0.7267	0.4674	0.0971	0.0613	0.9806	0.0184	0.0025	0.0115
ACL_join	Average number of double bonds in a fatty acid chain	27005778	metabolites	Caucasian	SNPs from the MHC (chr6 26M~34M) region was removed for this traits	-0.4	0.5518	-0.7248	0.4685	0.1473	0.089	0.9724	0.0208	0.0049	0.0107
ACL_join	Phospholipids in medium HDL	27005778	metabolites	Caucasian	SNPs from the MHC (chr6 26M~34M) region was removed for this traits	-0.3385	0.4679	-0.7235	0.4694	0.1459	0.0682	0.9652	0.018	-0.0011	0.0116
ACL_join	Total lipids in IDL	27005778	metabolites	Caucasian	SNPs from the MHC (chr6 26M~34M) region was removed for this traits	0.3014	0.4192	0.719	0.4721	0.2263	0.0942	1.0226	0.0405	-0.0104	0.0119
ACL_join	Leptin_adjBMI	26833098	hormone	Caucasian	SNPs from the MHC (chr6 26M~34M) region was removed for this traits	0.4239	0.5898	0.7187	0.4723	0.0723	0.0388	0.9936	0.0189	-0.0275	0.0127
ACL_join	adiponectin	22479202	cardiometabolic	mixed	Caution: using this data may yield less robust results due to minor departure of the LD structure; SNPs from the MHC (chr6 26M~34M) region was removed for this traits	-0.3308	0.4666	-0.709	0.4783	0.1203	0.0513	1.0087	0.021	0.0172	0.0134
ACL_join	Mean Hippocampus	25607358	brain_volumn	Caucasian	SNPs from the MHC (chr6 26M~34M) region was removed for this traits	-1.1097	1.58	-0.7023	0.4825	0.0917	0.1252	0.982	0.0211	0.0052	0.0115
ACL_join	Total lipids in chylomicrons and largest VLDL particles	27005778	metabolites	Caucasian	SNPs from the MHC (chr6 26M~34M) region was removed for this traits	0.3644	0.5257	0.6931	0.4882	0.1688	0.0935	0.9682	0.0208	-0.013	0.0118
ACL_join	Total cholesterol in large LDL	27005778	metabolites	Caucasian	SNPs from the MHC (chr6 26M~34M) region was removed for this traits	0.3373	0.4914	0.6864	0.4925	0.1498	0.0764	1.0417	0.0429	-0.0093	0.0117
ACL_join	Asthma	17611496	autoimmune	Caucasian	SNPs from the MHC (chr6 26M~34M) region was removed for this traits	0.3238	0.4767	0.6793	0.497	0.1559	0.0746	1.0033	0.0242	-0.004	0.0148
ACL_join	Rheumatoid Arthritis	24390342	autoimmune	Caucasian	SNPs from the MHC (chr6 26M~34M) region was removed for this traits	0.1869	0.2767	0.6756	0.4993	0.3292	0.1576	0.9822	0.063	0.0035	0.0135
ACL_join	LDL cholesterol	20686565	lipids	Caucasian	SNPs from the MHC (chr6 26M~34M) region was removed for this traits	0.1916	0.2842	0.6741	0.5002	0.211	0.0988	1.1394	0.0876	-0.0215	0.0156
ACL_join	urinary albumin-to-creatinine ratio (non-diabetes)	26631737	kidney	Caucasian	SNPs from the MHC (chr6 26M~34M) region was removed for this traits	0.3035	0.4542	0.6681	0.504	0.0936	0.0352	0.98	0.0234	-0.0063	0.0148
ACL_join	Cholesterol esters in large VLDL	27005778	metabolites	Caucasian	SNPs from the MHC (chr6 26M~34M) region was removed for this traits	0.3002	0.4592	0.6537	0.5133	0.1865	0.0872	1.046	0.0436	-0.0095	0.0118
ACL_join	Concentration of small VLDL particles	27005778	metabolites	Caucasian	SNPs from the MHC (chr6 26M~34M) region was removed for this traits	0.2601	0.3979	0.6537	0.5133	0.2789	0.1264	0.968	0.0276	-0.0083	0.0111
ACL_join	Phospholipids in large VLDL	27005778	metabolites	Caucasian	SNPs from the MHC (chr6 26M~34M) region was removed for this traits	0.2304	0.3555	0.648	0.517	0.3134	0.1184	0.9466	0.0242	-0.0145	0.0113
ACL_join	Mean Thalamus	25607358	brain_volumn	Caucasian	SNPs from the MHC (chr6 26M~34M) region was removed for this traits	-0.4604	0.7166	-0.6425	0.5205	0.1166	0.0979	0.979	0.0194	-0.0037	0.0108
ACL_join	urinary albumin-to-creatinine ratio	26631737	kidney	Caucasian	SNPs from the MHC (chr6 26M~34M) region was removed for this traits	0.2935	0.457	0.6422	0.5207	0.0741	0.0294	0.9806	0.0227	-0.0075	0.014
ACL_join	Concentration of IDL particles	27005778	metabolites	Caucasian	SNPs from the MHC (chr6 26M~34M) region was removed for this traits	0.2595	0.4068	0.6378	0.5236	0.2332	0.0963	1.0156	0.0389	-0.0101	0.0118
ACL_join	Triglycerides in small VLDL	27005778	metabolites	Caucasian	SNPs from the MHC (chr6 26M~34M) region was removed for this traits	0.2661	0.4182	0.6363	0.5246	0.2495	0.1286	0.9682	0.028	-0.0133	0.0108
ACL_join	platelet count	22139419	haemotological	Caucasian	SNPs from the MHC (chr6 26M~34M) region was removed for this traits	-0.2058	0.3376	-0.6097	0.542	0.1472	0.0307	0.9569	0.0228	0.0034	0.0128
ACL_join	Triglycerides in medium VLDL	27005778	metabolites	Caucasian	SNPs from the MHC (chr6 26M~34M) region was removed for this traits	0.2383	0.3961	0.6015	0.5475	0.2356	0.1131	0.9677	0.0238	-0.0095	0.0108
ACL_join	Phospholipids in large HDL	27005778	metabolites	Caucasian	SNPs from the MHC (chr6 26M~34M) region was removed for this traits	-0.3585	0.6017	-0.5959	0.5513	0.1015	0.0617	0.9842	0.0171	-0.0044	0.0109
ACL_join	height_2010	20881960	anthropometric	Caucasian	SNPs from the MHC (chr6 26M~34M) region was removed for this traits	0.1236	0.2078	0.5948	0.552	0.3096	0.0426	0.991	0.0425	-0.0051	0.0156
ACL_join	femoral neck bone mineral density	22504420	bone	Caucasian	SNPs from the MHC (chr6 26M~34M) region was removed for this traits	0.1594	0.2692	0.5921	0.5538	0.2878	0.0565	0.9978	0.0323	-0.0017	0.0145
ACL_join	Triglycerides in very small VLDL	27005778	metabolites	Caucasian	SNPs from the MHC (chr6 26M~34M) region was removed for this traits	0.2179	0.3682	0.5918	0.554	0.3175	0.1312	0.9733	0.0309	-0.0088	0.0108
ACL_join	Mean Putamen	25607358	brain_volumn	Caucasian	SNPs from the MHC (chr6 26M~34M) region was removed for this traits	0.2476	0.4242	0.5838	0.5594	0.2495	0.0997	0.9524	0.0194	-0.0105	0.0124
ACL_join	Cholesterol esters in medium LDL	27005778	metabolites	Caucasian	SNPs from the MHC (chr6 26M~34M) region was removed for this traits	0.2681	0.4617	0.5808	0.5614	0.1859	0.0874	1.0443	0.0414	-0.01	0.0119
ACL_join	Cholesterol esters in large HDL	27005778	metabolites	Caucasian	SNPs from the MHC (chr6 26M~34M) region was removed for this traits	-0.4375	0.7546	-0.5798	0.562	0.0719	0.0618	0.9965	0.0195	-0.0017	0.0109
ACL_join	Total lipids in large HDL	27005778	metabolites	Caucasian	SNPs from the MHC (chr6 26M~34M) region was removed for this traits	-0.3622	0.638	-0.5676	0.5703	0.0922	0.0607	0.9898	0.0182	-0.0045	0.0109
ACL_join	Triglycerides in chylomicrons and largest VLDL particles	27005778	metabolites	Caucasian	SNPs from the MHC (chr6 26M~34M) region was removed for this traits	0.2717	0.4822	0.5634	0.5731	0.1874	0.112	0.9578	0.0237	-0.0155	0.0112
ACL_join	obesity class 3	23563607	anthropometric	Caucasian	SNPs from the MHC (chr6 26M~34M) region was removed for this traits	-0.1561	0.2778	-0.5619	0.5742	0.1956	0.0382	0.9289	0.0242	-0.0168	0.0141
ACL_join	Average number of methylene groups per a double bond	27005778	metabolites	Caucasian	Caution: using this data may yield results outside bounds due to relative low Z score of the SNP heritability of the trait; SNPs from the MHC (chr6 26M~34M) region was removed for this traits	0.2817	0.506	0.5567	0.5778	0.1956	0.1023	0.9595	0.0195	-0.0041	0.0107
ACL_join	Serum total cholesterol	27005778	metabolites	Caucasian	Caution: using this data may yield results outside bounds due to relative low Z score of the SNP heritability of the trait; SNPs from the MHC (chr6 26M~34M) region was removed for this traits	0.2176	0.3985	0.546	0.585	0.2259	0.0893	1.0181	0.0366	-0.0186	0.0118
ACL_join	Ever vs never smoked	20418890	smoking_behaviour	Caucasian	SNPs from the MHC (chr6 26M~34M) region was removed for this traits	-0.1755	0.3243	-0.5412	0.5884	0.0752	0.019	1.0121	0.0184	-0.0018	0.0116
ACL_join	Total cholesterol in very large HDL	27005778	metabolites	Caucasian	Caution: using this data may yield results outside bounds due to relative low Z score of the SNP heritability of the trait; SNPs from the MHC (chr6 26M~34M) region was removed for this traits	-0.6447	1.1962	-0.539	0.5899	0.038	0.0593	1.023	0.0214	-0.0095	0.0121
ACL_join	Attention deficit hyperactivity disorder	20732625	psychiatric	Caucasian	Caution: using this data may yield results outside bounds due to relative low Z score of the SNP heritability of the trait; SNPs from the MHC (chr6 26M~34M) region was removed for this traits	0.2805	0.5225	0.5369	0.5913	0.4665	0.2523	1.0066	0.0189	-0.0189	0.013
ACL_join	Concentration of large LDL particles	27005778	metabolites	Caucasian	SNPs from the MHC (chr6 26M~34M) region was removed for this traits	0.2298	0.4312	0.5329	0.5941	0.1975	0.0911	1.0406	0.0423	-0.0091	0.0117
ACL_join	HOMA-B	20081858	glycemic	Caucasian	SNPs from the MHC (chr6 26M~34M) region was removed for this traits	0.2751	0.5212	0.5279	0.5976	0.0635	0.0358	0.9747	0.0185	-0.0067	0.0123
ACL_join	lumbar spine bone mineral density	22504420	bone	Caucasian	SNPs from the MHC (chr6 26M~34M) region was removed for this traits	-0.187	0.3629	-0.5153	0.6063	0.2168	0.059	1.0454	0.0354	0.0116	0.0151
ACL_join	18:2; linoleic acid (LA)	27005778	metabolites	Caucasian	SNPs from the MHC (chr6 26M~34M) region was removed for this traits	0.2399	0.4722	0.508	0.6115	0.2837	0.1478	1.0058	0.0259	-0.0114	0.0115
ACL_join	Total lipids in very large VLDL	27005778	metabolites	Caucasian	SNPs from the MHC (chr6 26M~34M) region was removed for this traits	0.223	0.4401	0.5068	0.6123	0.2261	0.1023	0.9522	0.0211	-0.0102	0.0118
ACL_join	Total lipids in very large HDL	27005778	metabolites	Caucasian	Caution: using this data may yield results outside bounds due to relative low Z score of the SNP heritability of the trait; SNPs from the MHC (chr6 26M~34M) region was removed for this traits	-0.6142	1.2134	-0.5062	0.6127	0.0363	0.0627	1.0216	0.0216	-0.0135	0.0118
ACL_join	Concentration of large HDL particles	27005778	metabolites	Caucasian	SNPs from the MHC (chr6 26M~34M) region was removed for this traits	-0.3117	0.6161	-0.5059	0.613	0.0948	0.0602	0.9868	0.0175	-0.0056	0.0109
ACL_join	Total lipids in large VLDL	27005778	metabolites	Caucasian	SNPs from the MHC (chr6 26M~34M) region was removed for this traits	0.1906	0.3801	0.5015	0.616	0.2641	0.1073	0.9562	0.0216	-0.0088	0.0113
ACL_join	Total lipids in medium LDL	27005778	metabolites	Caucasian	SNPs from the MHC (chr6 26M~34M) region was removed for this traits	0.2226	0.4475	0.4975	0.6188	0.1901	0.09	1.0405	0.0398	-0.0092	0.0117
ACL_join	Free cholesterol in very large HDL	27005778	metabolites	Caucasian	Caution: using this data may yield results outside bounds due to relative low Z score of the SNP heritability of the trait; SNPs from the MHC (chr6 26M~34M) region was removed for this traits	-0.53	1.1072	-0.4787	0.6322	0.0371	0.0559	1.0233	0.0214	-0.0078	0.0119
ACL_join	Triglycerides in IDL	27005778	metabolites	Caucasian	SNPs from the MHC (chr6 26M~34M) region was removed for this traits	0.1733	0.3641	0.4758	0.6342	0.2913	0.1123	0.989	0.0329	-0.0093	0.0113
ACL_join	Total lipids in medium VLDL	27005778	metabolites	Caucasian	SNPs from the MHC (chr6 26M~34M) region was removed for this traits	0.184	0.3867	0.4758	0.6342	0.2616	0.119	0.9604	0.0238	-0.009	0.0108
ACL_join	Total cholesterol in medium LDL	27005778	metabolites	Caucasian	SNPs from the MHC (chr6 26M~34M) region was removed for this traits	0.2265	0.48	0.4719	0.637	0.1533	0.0783	1.0398	0.0399	-0.0086	0.0118
ACL_join	Apolipoprotein A-I	27005778	metabolites	Caucasian	SNPs from the MHC (chr6 26M~34M) region was removed for this traits	-0.1894	0.4057	-0.4669	0.6406	0.2046	0.0658	0.9487	0.0177	-0.015	0.011
ACL_join	Mean Pallidum	25607358	brain_volumn	Caucasian	SNPs from the MHC (chr6 26M~34M) region was removed for this traits	-0.2249	0.482	-0.4667	0.6407	0.2707	0.1061	0.9678	0.0193	-0.0054	0.0133
ACL_join	Serum total triglycerides	27005778	metabolites	Caucasian	SNPs from the MHC (chr6 26M~34M) region was removed for this traits	0.1735	0.3822	0.4539	0.6499	0.3085	0.1447	0.9549	0.0303	-0.0134	0.0109
ACL_join	Cholesterol esters in large VLDL	27005778	metabolites	Caucasian	SNPs from the MHC (chr6 26M~34M) region was removed for this traits	0.1888	0.4187	0.4508	0.6522	0.2445	0.1189	0.9626	0.0234	-0.0131	0.0117
ACL_join	obesity class 2	23563607	anthropometric	Caucasian	SNPs from the MHC (chr6 26M~34M) region was removed for this traits	-0.1308	0.2917	-0.4483	0.6539	0.1938	0.0395	0.9935	0.0298	-0.0137	0.0168
ACL_join	Phospholipids in chylomicrons and largest VLDL particles	27005778	metabolites	Caucasian	SNPs from the MHC (chr6 26M~34M) region was removed for this traits	0.1937	0.4393	0.441	0.6592	0.212	0.1	0.9416	0.022	-0.0144	0.0111
ACL_join	Femoral Neck bone mineral density	26367794	bone	mixed	Caution: using this data may yield less robust results due to minor departure of the LD structure; SNPs from the MHC (chr6 26M~34M) region was removed for this traits	-0.133	0.3052	-0.4357	0.663	0.125	0.0309	0.9978	0.0239	0.0025	0.0132
ACL_join	Mean platelet volume	22139419	haemotological	Caucasian	SNPs from the MHC (chr6 26M~34M) region was removed for this traits	0.1646	0.3802	0.4328	0.6651	0.3135	0.1615	0.9849	0.0267	0.0108	0.014
ACL_join	Age at Menarche	25231870	reproductive	Caucasian	SNPs from the MHC (chr6 26M~34M) region was removed for this traits	0.0842	0.1963	0.4289	0.668	0.2128	0.0234	0.9292	0.0268	-0.0032	0.0158
ACL_join	Depressive symptoms	27089181	psychiatric	Caucasian	SNPs from the MHC (chr6 26M~34M) region was removed for this traits	0.1797	0.4269	0.4209	0.6738	0.039	0.0092	1.0156	0.0226	-0.0227	0.0145
ACL_join	Phospholipids in very large HDL	27005778	metabolites	Caucasian	SNPs from the MHC (chr6 26M~34M) region was removed for this traits	-0.3879	0.9291	-0.4175	0.6763	0.0465	0.0602	1.0072	0.0208	-0.0129	0.0115
ACL_join	Anorexia Nervosa	24514567	psychiatric	Caucasian	SNPs from the MHC (chr6 26M~34M) region was removed for this traits	-0.1154	0.2844	-0.4058	0.6849	0.5779	0.0722	0.8787	0.0176	-0.0074	0.0126
ACL_join	Concentration of medium LDL particles	27005778	metabolites	Caucasian	SNPs from the MHC (chr6 26M~34M) region was removed for this traits	0.1746	0.4388	0.3978	0.6908	0.1923	0.0913	1.0394	0.0392	-0.0085	0.0117
ACL_join	child birth length	25281659	anthropometric	Caucasian	SNPs from the MHC (chr6 26M~34M) region was removed for this traits	-0.3619	0.9106	-0.3975	0.691	0.0389	0.0554	1.0263	0.0214	0.0052	0.015
ACL_join	Total cholesterol in LDL	27005778	metabolites	Caucasian	SNPs from the MHC (chr6 26M~34M) region was removed for this traits	0.1766	0.4459	0.3961	0.692	0.173	0.0816	1.0389	0.0414	-0.0079	0.0117
ACL_join	Phospholipids in medium LDL	27005778	metabolites	Caucasian	SNPs from the MHC (chr6 26M~34M) region was removed for this traits	0.1874	0.477	0.3928	0.6944	0.1437	0.0777	1.0335	0.036	-0.0061	0.0116
ACL_join	serumurate_overweight_all	25811787	uric_acid	Caucasian	Caution: using this data may yield results outside bounds due to relative low Z score of the SNP heritability of the trait; SNPs from the MHC (chr6 26M~34M) region was removed for this traits	0.2534	0.647	0.3916	0.6953	0.1555	0.1341	1.0103	0.0162	-0.009	0.0121
ACL_join	Total cholesterol in small LDL	27005778	metabolites	Caucasian	SNPs from the MHC (chr6 26M~34M) region was removed for this traits	0.1653	0.4357	0.3794	0.7044	0.2051	0.0825	1.038	0.0366	-0.0129	0.0119
ACL_join	Forced expiratory volume in 1 second (FEV1)/Forced Vital capacity(FVC)	21946350	lung_function	Caucasian	SNPs from the MHC (chr6 26M~34M) region was removed for this traits	-0.1275	0.3407	-0.3744	0.7081	0.1375	0.0338	0.9361	0.0209	-0.0035	0.0127
ACL_join	Mean Caudate	25607358	brain_volumn	Caucasian	SNPs from the MHC (chr6 26M~34M) region was removed for this traits	-0.159	0.429	-0.3705	0.711	0.2939	0.1032	0.9661	0.0186	-0.0093	0.0126
ACL_join	Mean diameter for VLDL particles	27005778	metabolites	Caucasian	SNPs from the MHC (chr6 26M~34M) region was removed for this traits	-0.207	0.562	-0.3683	0.7127	0.1828	0.114	0.9849	0.0216	-0.0018	0.011
ACL_join	Childhood_IQ	23358156	education	Caucasian	SNPs from the MHC (chr6 26M~34M) region was removed for this traits	0.1508	0.413	0.3652	0.7149	0.6041	0.1364	0.9379	0.0258	-0.0142	0.0163
ACL_join	2hr glucose adjusted for BMI	20081857	glycemic	Caucasian	Caution: using this data may yield results outside bounds due to relative low Z score of the SNP heritability of the trait; SNPs from the MHC (chr6 26M~34M) region was removed for this traits	-0.1876	0.5168	-0.3631	0.7166	0.1598	0.0983	0.9886	0.0197	0.014	0.0137
ACL_join	Triglycerides in very large VLDL	27005778	metabolites	Caucasian	SNPs from the MHC (chr6 26M~34M) region was removed for this traits	0.1464	0.4153	0.3525	0.7245	0.25	0.1103	0.947	0.0225	-0.0135	0.0116
ACL_join	Inflammatory Bowel Disease (Euro)	26192919	autoimmune	Caucasian	SNPs from the MHC (chr6 26M~34M) region was removed for this traits	0.0831	0.2361	0.352	0.7248	0.3625	0.0897	1.1008	0.0359	-0.0136	0.0125
ACL_join	Concentration of chylomicrons and largest VLDL particles	27005778	metabolites	Caucasian	SNPs from the MHC (chr6 26M~34M) region was removed for this traits	0.1637	0.4706	0.3479	0.7279	0.2022	0.1088	0.969	0.0233	-0.0084	0.0115
ACL_join	Triglycerides in large VLDL	27005778	metabolites	Caucasian	SNPs from the MHC (chr6 26M~34M) region was removed for this traits	0.1281	0.3732	0.3432	0.7315	0.268	0.1079	0.9474	0.0226	-0.0112	0.0113
ACL_join	PGC cross-disorder analysis	23453885	psychiatric	Caucasian	SNPs from the MHC (chr6 26M~34M) region was removed for this traits	-0.122	0.3558	-0.3429	0.7317	0.1791	0.0321	1.0252	0.0291	-0.002	0.0178
ACL_join	Total cholesterol in HDL	27005778	metabolites	Caucasian	SNPs from the MHC (chr6 26M~34M) region was removed for this traits	-0.173	0.5185	-0.3337	0.7386	0.1145	0.0529	0.9818	0.0166	-0.0041	0.0109
ACL_join	Lung cancer (squamous cell)	24880342	cancer	Caucasian	Caution: using this data may yield results outside bounds due to relative low Z score of the SNP heritability of the trait; SNPs from the MHC (chr6 26M~34M) region was removed for this traits	0.2363	0.7346	0.3217	0.7477	0.0676	0.0461	0.9835	0.0189	-0.0004	0.013
ACL_join	Ratio of bisallylic groups to total fatty acids	27005778	metabolites	Caucasian	Caution: using this data may yield results outside bounds due to relative low Z score of the SNP heritability of the trait; SNPs from the MHC (chr6 26M~34M) region was removed for this traits	-0.1291	0.4197	-0.3076	0.7584	0.296	0.1156	0.9553	0.0214	-0.0002	0.0111
ACL_join	Coronary artery disease	26343387	cardiometabolic	mixed	Caution: using this data may yield less robust results due to minor departure of the LD structure; SNPs from the MHC (chr6 26M~34M) region was removed for this traits	0.0733	0.2412	0.3038	0.7613	0.0854	0.0118	1.0391	0.0235	-0.0166	0.0132
ACL_join	Apolipoprotein B	27005778	metabolites	Caucasian	SNPs from the MHC (chr6 26M~34M) region was removed for this traits	-0.1041	0.3477	-0.2993	0.7647	0.3164	0.0979	0.9971	0.032	-0.0036	0.012
ACL_join	Free cholesterol to esterified cholesterol ratio	27005778	metabolites	Caucasian	Caution: using this data may yield results outside bounds due to relative low Z score of the SNP heritability of the trait; SNPs from the MHC (chr6 26M~34M) region was removed for this traits	0.2106	0.7066	0.298	0.7657	0.1041	0.1043	1.0304	0.0299	-0.0085	0.0117
ACL_join	Mono-unsaturated fatty acids	27005778	metabolites	Caucasian	Caution: using this data may yield results outside bounds due to relative low Z score of the SNP heritability of the trait; SNPs from the MHC (chr6 26M~34M) region was removed for this traits	0.1262	0.452	0.2792	0.7801	0.2622	0.1496	0.9734	0.0218	-0.0098	0.0114
ACL_join	waist-to-hip ratio	25673412	anthropometric	Caucasian	SNPs from the MHC (chr6 26M~34M) region was removed for this traits	0.0532	0.1951	0.2724	0.7853	0.1443	0.0184	0.8999	0.0246	-0.0131	0.0135
ACL_join	serum creatinine (non-diabetes)	26831199	kidney	mixed	Caution: using this data may yield less robust results due to minor departure of the LD structure; SNPs from the MHC (chr6 26M~34M) region was removed for this traits	-0.0742	0.2734	-0.2716	0.7859	0.1263	0.0248	0.9729	0.0335	-0.0263	0.015
ACL_join	Ulcerative colitis	26192919	autoimmune	Caucasian	SNPs from the MHC (chr6 26M~34M) region was removed for this traits	-0.08	0.2972	-0.2691	0.7879	0.305	0.0843	1.0861	0.0376	0.0058	0.0119
ACL_join	Lumbar Spine bone mineral density	26367794	bone	mixed	Caution: using this data may yield less robust results due to minor departure of the LD structure; SNPs from the MHC (chr6 26M~34M) region was removed for this traits	-0.1157	0.4323	-0.2677	0.7889	0.0773	0.0298	1.0104	0.0242	0.0029	0.014
ACL_join	Concentration of very large VLDL particles	27005778	metabolites	Caucasian	SNPs from the MHC (chr6 26M~34M) region was removed for this traits	0.1059	0.4001	0.2647	0.7913	0.2476	0.1078	0.9531	0.0208	-0.004	0.012
ACL_join	Creatinine	27005778	metabolites	Caucasian	SNPs from the MHC (chr6 26M~34M) region was removed for this traits	-0.1431	0.554	-0.2583	0.7961	0.0767	0.0574	1.0053	0.0189	-0.0034	0.0121
ACL_join	Neo-openness to experience	21173776	personality	Caucasian	SNPs from the MHC (chr6 26M~34M) region was removed for this traits	-0.1375	0.579	-0.2374	0.8124	0.1339	0.0676	1.0045	0.0199	0.0081	0.0136
ACL_join	infant head circumference	22504419	anthropometric	Caucasian	SNPs from the MHC (chr6 26M~34M) region was removed for this traits	-0.1233	0.5204	-0.2369	0.8128	0.2586	0.1222	0.9821	0.0218	0.0149	0.0139
ACL_join	Cigarettes smoked per day	20418890	smoking_behaviour	Caucasian	SNPs from the MHC (chr6 26M~34M) region was removed for this traits	-0.2252	0.9728	-0.2314	0.817	0.0197	0.0288	1.0261	0.0168	0.0076	0.0129
ACL_join	HbA1C	20858683	glycemic	Caucasian	SNPs from the MHC (chr6 26M~34M) region was removed for this traits	0.0794	0.3503	0.2268	0.8206	0.0774	0.0282	0.9657	0.0174	-0.0129	0.0123
ACL_join	fasting insulin main effect	22581228	glycemic	Caucasian	SNPs from the MHC (chr6 26M~34M) region was removed for this traits	0.0817	0.373	0.219	0.8267	0.0896	0.0273	0.9996	0.0191	-0.0042	0.0131
ACL_join	Eczema	26482879	autoimmune	mixed	Caution: using this data may yield less robust results due to minor departure of the LD structure; SNPs from the MHC (chr6 26M~34M) region was removed for this traits	-0.1478	0.6851	-0.2157	0.8292	0.0486	0.0451	1.0397	0.0216	0.0022	0.0128
ACL_join	Leucine	27005778	metabolites	Caucasian	Caution: using this data may yield results outside bounds due to relative low Z score of the SNP heritability of the trait; SNPs from the MHC (chr6 26M~34M) region was removed for this traits	0.128	0.6062	0.2112	0.8328	0.0786	0.0598	0.9851	0.0176	-0.0039	0.0114
ACL_join	Years of schooling	27225129	eduction	Caucasian	SNPs from the MHC (chr6 26M~34M) region was removed for this traits	-0.0334	0.1689	-0.1978	0.8432	0.1328	0.0125	0.9216	0.028	-8.34e-05	0.0124
ACL_join	Total lipids in small LDL	27005778	metabolites	Caucasian	SNPs from the MHC (chr6 26M~34M) region was removed for this traits	0.0766	0.4129	0.1855	0.8528	0.2274	0.097	1.0238	0.0346	-0.009	0.0118
ACL_join	College completion	23722424	education	Caucasian	SNPs from the MHC (chr6 26M~34M) region was removed for this traits	-0.0465	0.2533	-0.1838	0.8542	0.0905	0.0185	1.0061	0.0273	0.0046	0.0149
ACL_join	Leptin_not_adjBMI	26833098	hormone	Caucasian	SNPs from the MHC (chr6 26M~34M) region was removed for this traits	-0.0857	0.479	-0.1788	0.8581	0.0874	0.0384	0.966	0.018	-0.011	0.0138
ACL_join	HOMA-IR	20081858	glycemic	Caucasian	SNPs from the MHC (chr6 26M~34M) region was removed for this traits	0.0909	0.5115	0.1777	0.859	0.0553	0.0299	0.9898	0.0182	-0.006	0.0121
ACL_join	waist circumference	25673412	anthropometric	Caucasian	SNPs from the MHC (chr6 26M~34M) region was removed for this traits	-0.0336	0.189	-0.1777	0.859	0.1402	0.0135	0.8287	0.0196	-0.0095	0.0125
ACL_join	Total cholesterol in large HDL	27005778	metabolites	Caucasian	SNPs from the MHC (chr6 26M~34M) region was removed for this traits	-0.1038	0.6027	-0.1723	0.8632	0.0902	0.056	0.9995	0.0195	-0.0027	0.0111
ACL_join	Chronic Kidney Disease	26831199	kidney	mixed	Caution: using this data may yield less robust results due to minor departure of the LD structure; SNPs from the MHC (chr6 26M~34M) region was removed for this traits	0.1461	0.876	0.1668	0.8675	0.0074	0.0105	1.0294	0.0203	0.018	0.0129
ACL_join	Albumin	27005778	metabolites	Caucasian	Caution: using this data may yield results outside bounds due to relative low Z score of the SNP heritability of the trait; SNPs from the MHC (chr6 26M~34M) region was removed for this traits	-0.2543	1.5678	-0.1622	0.8711	0.0172	0.0587	0.9575	0.0175	0.0139	0.0113
ACL_join	Childhood obesity	22484627	anthropometric	Caucasian	SNPs from the MHC (chr6 26M~34M) region was removed for this traits	0.0423	0.2663	0.1589	0.8738	0.7229	0.1585	0.877	0.0226	0.0028	0.0136
ACL_join	Tyrosine	27005778	metabolites	Caucasian	Caution: using this data may yield results outside bounds due to relative low Z score of the SNP heritability of the trait; SNPs from the MHC (chr6 26M~34M) region was removed for this traits	0.1104	0.807	0.1367	0.8912	0.0333	0.0485	1.0063	0.0177	0.001	0.0105
ACL_join	Bipolar disorder	21926972	psychiatric	Caucasian	SNPs from the MHC (chr6 26M~34M) region was removed for this traits	-0.0401	0.3026	-0.1326	0.8945	0.5011	0.1052	1.0316	0.0212	0.011	0.0135
ACL_join	Triglycerides	20686565	lipids	Caucasian	SNPs from the MHC (chr6 26M~34M) region was removed for this traits	-0.0445	0.3405	-0.1306	0.8961	0.2271	0.1119	0.9204	0.0765	-0.0025	0.0161
ACL_join	ICV	25607358	brain_volumn	Caucasian	SNPs from the MHC (chr6 26M~34M) region was removed for this traits	0.0431	0.4078	0.1057	0.9158	0.2116	0.1053	0.9725	0.0181	-0.0042	0.0116
ACL_join	Concentration of medium VLDL particles	27005778	metabolites	Caucasian	SNPs from the MHC (chr6 26M~34M) region was removed for this traits	-0.0411	0.4426	-0.0928	0.926	0.2269	0.1287	0.9646	0.0262	-0.0058	0.0112
ACL_join	Alzheimers disease	24162737	psychiatric	Caucasian	SNPs from the MHC (chr6 26M~34M) region was removed for this traits	0.0274	0.3729	0.0736	0.9414	0.071	0.0285	1.0308	0.0222	-0.0157	0.0129
ACL_join	Ratio of bisallylic groups to double bonds	27005778	metabolites	Caucasian	Caution: using this data may yield results outside bounds due to relative low Z score of the SNP heritability of the trait; SNPs from the MHC (chr6 26M~34M) region was removed for this traits	-0.03	0.413	-0.0726	0.9421	0.3005	0.1047	0.954	0.0199	-0.0025	0.012
ACL_join	acetate	27005778	metabolites	Caucasian	Caution: using this data may yield results outside bounds due to relative low Z score of the SNP heritability of the trait; SNPs from the MHC (chr6 26M~34M) region was removed for this traits	0.0581	0.8675	0.067	0.9466	0.0293	0.0463	0.9975	0.0168	-0.0031	0.0106
ACL_join	extreme bmi	23563607	anthropometric	Caucasian	SNPs from the MHC (chr6 26M~34M) region was removed for this traits	0.0156	0.238	0.0654	0.9479	1.1537	0.1944	0.9427	0.0333	-0.0136	0.0166
ACL_join	hip circumference	25673412	anthropometric	Caucasian	SNPs from the MHC (chr6 26M~34M) region was removed for this traits	-0.012	0.1857	-0.0647	0.9484	0.1368	0.0155	0.8441	0.0217	-0.0016	0.0124
ACL_join	Omega-9 and saturated fatty acids	27005778	metabolites	Caucasian	Caution: using this data may yield results outside bounds due to relative low Z score of the SNP heritability of the trait; SNPs from the MHC (chr6 26M~34M) region was removed for this traits	0.0313	0.51	0.0613	0.9511	0.2209	0.1506	0.9907	0.0226	-0.0088	0.0112
ACL_join	Concentration of small LDL particles	27005778	metabolites	Caucasian	SNPs from the MHC (chr6 26M~34M) region was removed for this traits	0.0246	0.4073	0.0604	0.9518	0.237	0.1006	1.0221	0.0339	-0.0094	0.0118
ACL_join	Free cholesterol	27005778	metabolites	Caucasian	Caution: using this data may yield results outside bounds due to relative low Z score of the SNP heritability of the trait; SNPs from the MHC (chr6 26M~34M) region was removed for this traits	0.0414	0.7121	0.0582	0.9536	0.0932	0.1	1.043	0.0337	-0.0114	0.0122
ACL_join	Mean diameter for HDL particles	27005778	metabolites	Caucasian	SNPs from the MHC (chr6 26M~34M) region was removed for this traits	0.0337	0.5846	0.0576	0.954	0.1051	0.0638	0.9932	0.0191	-0.0168	0.0114
ACL_join	Alanine	27005778	metabolites	Caucasian	SNPs from the MHC (chr6 26M~34M) region was removed for this traits	0.0214	0.3956	0.054	0.957	0.2076	0.0837	0.9921	0.0224	4.84e-06	0.0107
ACL_join	Triglycerides in very large HDL	27005778	metabolites	Caucasian	Caution: using this data may yield results outside bounds due to relative low Z score of the SNP heritability of the trait; SNPs from the MHC (chr6 26M~34M) region was removed for this traits	0.0207	0.3861	0.0536	0.9572	0.2664	0.0965	0.9587	0.0235	-0.0172	0.0122
ACL_join	Free cholesterol in large HDL	27005778	metabolites	Caucasian	SNPs from the MHC (chr6 26M~34M) region was removed for this traits	-0.0305	0.597	-0.0511	0.9592	0.0949	0.0558	1.0044	0.0192	-0.0056	0.0113
ACL_join	serum creatinine	26831199	kidney	mixed	Caution: using this data may yield less robust results due to minor departure of the LD structure; SNPs from the MHC (chr6 26M~34M) region was removed for this traits	0.0124	0.2662	0.0465	0.9629	0.1187	0.0225	0.9761	0.0342	-0.0327	0.0141
ACL_join	age of smoking initiation	20418890	smoking_behaviour	Caucasian	SNPs from the MHC (chr6 26M~34M) region was removed for this traits	-0.0189	0.4148	-0.0455	0.9637	0.1298	0.0439	1.0005	0.0158	-0.0045	0.0121
ACL_join	22:6; docosahexaenoic acid	27005778	metabolites	Caucasian	SNPs from the MHC (chr6 26M~34M) region was removed for this traits	0.0179	0.4611	0.0388	0.9691	0.2167	0.0969	0.991	0.0212	-0.0079	0.0117
ACL_join	Glycoprotein acetyls; mainly a1-acid glycoprotein	27005778	metabolites	Caucasian	SNPs from the MHC (chr6 26M~34M) region was removed for this traits	-0.0104	0.3759	-0.0276	0.9779	0.2343	0.079	0.9598	0.019	0.0045	0.0116
ACL_join	extreme height	23563607	anthropometric	Caucasian	SNPs from the MHC (chr6 26M~34M) region was removed for this traits	0.0052	0.266	0.0197	0.9843	1.4321	0.2414	0.994	0.0428	0.0048	0.0209
ACL_join	Concentration of very large HDL particles	27005778	metabolites	Caucasian	Caution: using this data may yield results outside bounds due to relative low Z score of the SNP heritability of the trait; SNPs from the MHC (chr6 26M~34M) region was removed for this traits	0.0038	0.9301	0.0041	0.9968	0.0499	0.058	1.0129	0.0216	-0.0133	0.0118
ACL_join	Description of average fatty acid chain length; not actual carbon number	27005778	metabolites	Caucasian	SNPs from the MHC (chr6 26M~34M) region was removed for this traits	-0.0021	0.6639	-0.0031	0.9975	0.1083	0.0752	0.971	0.019	-0.0033	0.0109
ACL_join	Concentration of large VLDL particles	27005778	metabolites	Caucasian	SNPs from the MHC (chr6 26M~34M) region was removed for this traits	0.0012	0.3994	0.0029	0.9977	0.2846	0.1381	0.9436	0.0261	-0.0054	0.0121
ACL_join	fasting proinsulin	20081858	glycemic	Caucasian	Caution: using this data may yield results outside bounds due to relative low Z score of the SNP heritability of the trait; SNPs from the MHC (chr6 26M~34M) region was removed for this traits	NA	NA	NA	NA	-0.091	0.1057	1.0105	0.0185	-0.0038	0.0117
ACL_join	Glucose	27005778	metabolites	Caucasian	SNPs from the MHC (chr6 26M~34M) region was removed for this traits	NA	NA	NA	NA	NA	NA	NA	NA
ACL_join	Glutamine	27005778	metabolites	Caucasian	SNPs from the MHC (chr6 26M~34M) region was removed for this traits	NA	NA	NA	NA	NA	NA	NA	NA	NA	NA
ACL_join	Total lipids in large LDL	27005778	metabolites	Caucasian	SNPs from the MHC (chr6 26M~34M) region was removed for this traits	NA	NA	NA	NA	NA	NA	NA	NA
ACL_join	Total lipids in small HDL	27005778	metabolites	Caucasian	Caution: using this data may yield results outside bounds due to relative low Z score of the SNP heritability of the trait; SNPs from the MHC (chr6 26M~34M) region was removed for this traits	NA	NA	NA	NA	NA	NA	NA	NA	NA	NA
ACL_join	Valine	27005778	metabolites	Caucasian	SNPs from the MHC (chr6 26M~34M) region was removed for this traits	NA	NA	NA	NA	-0.0453	0.0467	1.0357	0.022	-0.0101	0.0118
ACL_join	Total Cholesterol	20686565	lipids	Caucasian	SNPs from the MHC (chr6 26M~34M) region was removed for this traits	NA	NA	NA	NA	NA	NA	NA	NA
ACL_join	Mean Accumbens	25607358	brain_volumn	Caucasian	Caution: using this data may yield results outside bounds due to relative low Z score of the SNP heritability of the trait SNPs from the MHC (chr6 26M~34M) region was removed for this traits	NA	NA	NA	NA	-0.1154	0.095	1.0169	0.0192	-0.0123	0.0129
ACL_join	Forearm Bone mineral density	26367794	bone	mixed	Caution: using this data may yield results outside bounds due to relative low Z score of the SNP heritability of the trait; using this data may yield less robust results due to minor departure of the LD structure; SNPs from the MHC (chr6 26M~34M) region was removed for this traits	NA	NA	NA	NA	-0.0569	0.1029	1.0427	0.0184	0.0013	0.013
